1 **CD4<sup>+</sup> T cell fate decisions are stochastic, precede cell division, depend on GITR co-**  
2 **stimulation, and are associated with uropodium development.**

3

4 Stephen P. Cobbold\*, Elizabeth Adams, Duncan Howie, Herman Waldmann.

5 Sir William Dunn School of Pathology, University of Oxford,

6 South Parks Road, Oxford OX1 3RE, UK.

7

8 \*Corresponding author.

9 Email: [stephen.cobbold@path.ox.ac.uk](mailto:stephen.cobbold@path.ox.ac.uk)

10

11 **Abstract**

12 During an immune response, naïve CD4<sup>+</sup> T cells proliferate and generate a range of effector,  
13 memory and regulatory T cell subsets, but how these processes are co-ordinated remains  
14 unclear. A traditional model suggests that memory cells use mitochondrial respiration and  
15 are survivors from a pool of previously proliferating and glycolytic, but short-lived effector  
16 cells. A more recent model proposes a binary commitment to either a memory or effector  
17 cell lineage during a first, asymmetric cell division, with each lineage able to undergo  
18 subsequent proliferation and differentiation. We used improved fixation and staining  
19 methods with imaging flow cytometry in an optimised *in vitro* system that indicates a third  
20 model. We found that cell fates result from stochastic decisions that depend on GITR co-  
21 stimulation and which take place before any cell division. Effector cell commitment is  
22 associated with mTORC2 signalling leading to uropodium development, while developing  
23 memory cells lose mitochondria, have a nuclear localization of NFκB and depend on TGFβ  
24 for their survival. Induced, T helper subsets and foxp3<sup>+</sup> regulatory T cells were found in both  
25 the effector and memory cell lineages. This *in vitro* model of T cell differentiation is well  
26 suited to testing how manipulation of cytokine, nutrient other components of the  
27 microenvironment might be exploited for therapeutic purposes.

28

29 [Abstract: 209 words, Text: ~9,350 words]

30

31 Keywords: T cell differentiation, cell fate, asymmetric cell division, imaging flow cytometry,  
32 GITR, mTOR signalling, uropodium.

33

## 34 1. Introduction

35 A fundamental feature of the adaptive immune system is the ability to mount a rapid and  
36 protective, secondary or memory response to a pathogen it has previously encountered. This  
37 memory derives from both an increase in the frequency of pathogen specific lymphocytes by  
38 clonal expansion together with their differentiation into long-lived memory cells that can  
39 rapidly generate the most appropriate secondary effector functions. As there is no affinity  
40 maturation in T cells, antigen specific T cells must be able to generate both the short-term,  
41 terminally differentiated effector cells for the primary response as well as long-lived,  
42 protective memory cells. The mechanisms by which these two distinct populations are  
43 generated from homogenous clones of naïve T cells remain poorly understood.

44 There are two prevalent hypotheses in the literature to explain how naïve T cells generate  
45 both short-term effector and long-term memory cells. The first is a linear model where  
46 activated T cells first proliferate, driven by cytokines such as IL-2, mTOR activation and  
47 glycolysis, to generate a large population of effector cells (1, 2). Once antigen is cleared,  
48 these effectors mostly die leaving a smaller population of surviving T cells that, in the  
49 presence of cytokines such as IL-15, fatty acid driven oxidative phosphorylation (3), and  
50 TNFRSF (CD27, CD134) signalling (4, 5) further differentiate into long-term memory T  
51 cells. Recently, a second, more controversial (6, 7) model suggests that after activation, T  
52 cells undergo one or more polarised or asymmetric cell divisions, with one daughter destined  
53 to become a short-lived effector cell while the other develops into a long-lived memory cell  
54 (8, 9). These alternate fates are said to be determined by an asymmetric inheritance during  
55 cytokinesis of the numb/notch signalling pathway (10), cell surface molecules such as CD4  
56 and CD8 (9, 11), transcription factors such as Tbet (8), and nutrient sensing pathways via  
57 PI3k and CD98 (12-14), which then contribute to the metabolic programming towards  
58 glycolysis in effector cells (15) and to oxidative phosphorylation in memory cells. Most of  
59 the published evidence in favour of either model concerns naïve CD8<sup>+</sup> T cells differentiating  
60 into cytotoxic effector versus memory T cells, but similar claims of asymmetric cell divisions  
61 are also emerging for conventional CD4<sup>+</sup> T cells (16).

62 Peripheral antigen specific, foxp3<sup>+</sup> expressing CD4<sup>+</sup> Treg cells are known to result from  
63 stimulation of naïve CD4<sup>+</sup> T cells in the presence of TGFβ, acting via a response element in  
64 CNS1 of the foxp3 locus (17). Very little is known about such induced Treg cells in the  
65 context of effector versus memory cell fate decisions (18), perhaps because the literature has  
66 concentrated on Treg cell development and repertoire selection in the thymus (19, 20).  
67 Peripherally induced, antigen specific CD4<sup>+</sup>foxp3<sup>+</sup> Treg cells are important for immune  
68 regulation and are required for certain forms of transplantation tolerance (21). Tolerance is  
69 not simply that T cell development has switched from an effector to regulatory cell fate, as  
70 tolerant mice can still sustain a large population of effector cells (22). In these circumstances,  
71 regulatory T cells and conventional memory cells have both previously been exposed to their  
72 antigen and both seem to depend on fatty acids and oxidative phosphorylation when  
73 compared to activated naïve cells and effector cells (23, 24). This might indicate some  
74 commonality in the mechanisms that determine the memory T cell and Treg cell fates. By  
75 analogy with models for conventional effector versus memory cell fate decision, peripheral  
76 Treg cells could also develop either as survivors from a previously proliferating effector cell  
77 population (25) or from a binary cell fate decision during an asymmetric cell division (9).

78 To study CD4<sup>+</sup> T cell fate decisions, we needed a system where we could control multiple  
79 stimuli through the TCR, co-stimulation, cytokines and nutrient availability, which together  
80 signal through overlapping and non-linear pathways. We did not want to restrict our  
81 observations to a binary outcome as there is the potential to generate a range of different

82 effector or memory cell populations with different probabilities. We developed an *in vitro*  
83 culture system to simultaneously study a range of cell fates such as proliferation versus cell  
84 death, effector versus memory commitment and conventional versus regulatory T cell subset  
85 differentiation, so that we could relate these to TCR, costimulatory, cytokine and nutrient  
86 sensing signalling pathways, at both the single cell and population levels. To achieve this we  
87 optimised multicolour staining methods together with imaging flow cytometry (26) so as to  
88 track and quantitate the complex outcomes from antigen driven stimulation *in vitro* of an  
89 uniform population of monoclonal, naïve CD4<sup>+</sup> T cells, and where we could control and  
90 manipulate the culture and stimulation conditions.

91 We used imaging flow cytometry as it is ideally suited to simultaneously quantifying multiple  
92 parameters at both the single cell and population level so allowing us to combine staining for  
93 markers of cell differentiation with structural information, such as the shape or asymmetry of  
94 cells, together with the localisation and polarisation of cell surface and nuclear markers, and  
95 of intracellular organelles such as mitochondria. The role of cell structure in lymphocyte  
96 function has been little studied at the population level, with conventional flow cytometry  
97 indicating only the size (forward scatter) and complexity (side scatter). One of the most  
98 microscopically obvious structures is the uropodium (27, 28), which is a large protrusion at  
99 the rear of lymphocytes migrating on an appropriate matrix. As well as a role in migration, it  
100 has been proposed that uropodia are important in interactions with antigen presenting cells,  
101 cytotoxicity, and cell fate decisions (28). Uropodia are dynamic structures requiring active  
102 maintenance of the cytoskeleton and microtubules, essential for effective immune responses  
103 *in vivo*, yet their role in lymphocytes is still poorly understood. Uropodia contain the bulk of  
104 the cytoplasm and organelles such as the microtubule organising centre (MTOC),  
105 mitochondria (29), lysosomes and golgi. Many of the cell surface molecules involved in  
106 interactions with other cells, including components of the immune synapse and CD44 are also  
107 localised to the uropodium (28).

108 We use a multi-dimensional analysis of many individual CD4<sup>+</sup> T cells in terms of their  
109 proliferation history, differentiation, cell structure, signalling and survival in response to the  
110 microenvironment within which they are stimulated. The data we present support a model that  
111 favours initial, stochastic cell fate commitments, for both conventional and regulatory CD4<sup>+</sup>  
112 T cells, that are dependent on multiple interacting signalling pathways during their initial  
113 activation. These act to determine the cell fate before the commencement of cell division,  
114 which then takes place entirely symmetrically to generate two identically committed  
115 daughters. Both the effector and memory cell populations proliferate. Effector cells die after  
116 4-5 cell divisions, while memory cells survive and enter quiescence as mTOR signalling  
117 decays as antigen is cleared or nutrients, such as amino acids, become limiting (30). These  
118 memory cells can then make further fate decisions upon secondary stimulation.

## 119 2. Materials and Methods

### 120 2.1 Mice

121 A1.RAG1<sup>-/-</sup> (TCR transgenic anti-Dby+IE<sup>k</sup>; on a CBA/Ca.RAG1<sup>-/-</sup> background: "A1RAG")  
122 (31), CBA/Ca, CBA.RAG1<sup>-/-</sup>, Marilyn.hCD2-Foxp3.RAG1<sup>-/-</sup> (TCR transgenic anti-Dby+IA<sup>b</sup>  
123 on a C57BL/6,RAG1<sup>-/-</sup> background with hCD2-Foxp3 reporter: "MARKI") (21) and  
124 C57BL/6J mice were bred and maintained under SPF conditions in the animal facility of the  
125 Sir William Dunn School of Pathology, Oxford, UK. All procedures were conducted in  
126 accordance with the Home Office Animals (Scientific Procedures) Act of 1986 (PPL  
127 30/3060).

### 128 2.2 Skin grafting

129 A1RAG female mice of 6-8 weeks of age were given male CBA.RAG1<sup>-/-</sup> skin grafts (31).  
130 Control mice were allowed to reject these grafts while the tolerant (31) group received 1mg  
131 of YTS 177 on day 0 and maintained their grafts until the end of the experiment. All mice  
132 were given second challenge male CBA.RAG1<sup>-/-</sup> skin grafts after 3 months and were  
133 sacrificed 7 days later and their draining lymph nodes were taken and prepared for staining  
134 with Mitotracker DR and antibody markers (Table 1).

### 135 2.3 TCR transgenic T cells and Treg cell cultures

136 CD4<sup>+</sup> TCR transgenic T cells were selected from spleen cells of female A1RAG or MARKI  
137 mice using the CD4 isolation kit (Miltenyi Biotec: 130-104-454) and were labelled with Cell  
138 Trace Violet (CTV: Invitrogen C34557), according to the manufacturers' instructions. These  
139 labelled CD4<sup>+</sup> T cells were cultured at 5x10<sup>5</sup> cells/ml in 48x1ml tissue culture plates in  
140 Advanced RPMI 1640 (Life Technologies 12633-020) with added GlutaMAX (Life  
141 technologies 35050), 10<sup>-5</sup> M mercaptoethanol, 10mM HEPES, a reduced (1/10) concentration  
142 of penicillin/streptomycin, plus 1% FCS together with either 1x10<sup>5</sup> syngeneic bmDC (32, 33)  
143 plus the appropriate Dby peptide (Dby-E<sup>k</sup>: REEALHQFRSGRKPI: 100nM unless otherwise  
144 stated, Dby-A<sup>b</sup>: NAGFNSNRANSSRSS: 10nM) (21, 31) or with CD3/CD28 beads  
145 (Dynabeads Mouse T-activator CD3/CD28: Life Technologies 11452D) at 1:1 ratio or with  
146 anti-CD3 (145-2C11: 0.1-5µg/ml or as stated, coated on plastic in 0.1M sodium bicarbonate)  
147 plus soluble anti-CD28 (1µg/ml clone 37.51) for 3 days (A1RAG cells) or 2 days (MARKI  
148 cells), unless time point stated otherwise, in a gassed, humidified incubator at 37°C plus 5%  
149 CO<sub>2</sub>. All cultures included 50U/ml rmIL-2, and 2ng/ml rhTGFβ (Peprotech 100-21C) plus  
150 100nM all trans-retinoic acid (ATRA: Sigma R2625), unless stated otherwise. Inhibitors  
151 were added where indicated: rapamycin (Calbiochem 553211: 50nM), Torin1 (Tocris  
152 Bioscience 4247: 250nM), anti-LFA-1 (FD441.8; 50µg/ml) (34), anti-GITR [YGITR 765.4  
153 (35, 36) 50µg/ml], anti-GITRL [YGL 386.2 (35) 50µg/ml].

### 154 2.4 Staining cells for 10 colour flow cytometric imaging

155 If the staining included anti-cytokine antibodies then Brefeldin A (5µg/ml) was added for the  
156 last 2 hours of cell culture. Staining for fixation sensitive cell surface markers (eg. CD25)  
157 and live cell stains were performed *in situ*, with minimal disturbance of the cells, by adding  
158 100µl of Advanced RPMI 1640 containing 5ng/ml Mitotracker DR (Invitrogen M22426) plus  
159 2µl of live/dead aqua (Life technologies L34957: 1 vial reconstituted in 40µl of DMSO),  
160 together with 1µg of each antibody conjugate (Table 1), to each 1 ml of culture, and  
161 incubated in the dark, in a humidified gassed (5% CO<sub>2</sub>) incubator at 37°C for 30-60 mins. If  
162 samples were to be analysed for mitotic cells in telophase, a pre-warmed (37°C) 40% solution  
163 of formaldehyde was added directly to the cultures to a final concentration of 4%  
164 formaldehyde and incubated at 37°C for 15 mins. Approx. 95% of the medium was then  
165 carefully aspirated without disturbing the cells and 200µl of warm (37°C)  
166 fix/permeabilisation buffer for Foxp3 staining (eBioscience 00-5123-43) added and incubated  
167 at 37°C in the dark for 2 hours. 1 ml of 1x Foxp3 permeabilisation buffer (eBioscience 00-  
168 8333-56) was then added, the cells were thoroughly re-suspended by vigorous pipetting,  
169 harvested and pelleted for labelling with antibody conjugates to fixation resistant cell surface  
170 epitopes (eg. CD4, GITR), if required, together with other required antibody conjugates  
171 (Table 1) in 1x permeabilisation buffer at room temperature for 1 hour. After washing in 1x  
172 permeabilisation buffer, cells were re-suspended in 15µl of PBS + 1% BSA + 0.1% NaN<sub>3</sub> and  
173 fixed by addition of an equal volume of PBS + 4% formalin together with a DNA stain eg. 7-  
174 actinomycin D (7AAD: 10µg/ml).

## 175 **2.5 Imaging Flow Cytometry**

176 Samples were run on a 2 camera, 12 channel ImageStream X MkII (Amnis Corporation) with  
177 the 60X Multimag objective and the Extended Depth of Field (EDF) option providing a  
178 resolution of 0.3 $\mu$ m per pixel and 16 $\mu$ m depth of field. Fluorescent excitation lasers and  
179 powers used were 405nm (50mW), 488nm (100mW) and 643nm (100mW) and the side  
180 scatter laser was turned off to allow channel 6 to be used for PE-Cy7. The 448nm laser must  
181 be used to excite all fluorophores emitting in channels 2-6, as any use of the 560nm laser  
182 compromised multicolour compensation. Bright field images were captured on channels 1  
183 and 9 (automatic power setting). A minimum of 30,000 images were acquired per sample  
184 using INSPIRE 200 software (Amnis Corporation). Images containing beads were excluded  
185 during acquisition as low intensity and high modulation of bright field channels 1 and 9.  
186 Images were analysed using the IDEAS v 6.2 software (Amnis Corporation).

## 187 **2.6 Analysis of flow cell images**

188 A colour compensation matrix was generated for all 10 fluorescence channels using samples  
189 stained with single colour reagents or antibody-conjugate coated compensation beads, run  
190 with the INSPIRE compensation settings, and analysed using the IDEAS compensation  
191 wizard. Note that is important to generate a new compensation matrix for each unique  
192 combination of fluorophores, and particular caution must be taken with the use of 7AAD or  
193 Mito-ID-Red, which emit in both channels 4 and 5 and overlap with PE-CF594. All images  
194 were initially gated for focus (using the Gradient RMS feature) on both bright field channels  
195 (1 and 9) followed by selecting for singlet cells (DNA intensity/aspect ratio) and live cells at  
196 the time of staining ie. live/dead aqua low intensity (channel 8) or low bright field contrast  
197 (channel 1).

## 198 **2.7 Identification and measurement of uropodia and associated stains**

199 The strategy for making masks (blue shading) for nuclear expression and identification of  
200 uropodia is shown in **Figure 1A**. The uropodium mask relies on the fact that irregular shaped  
201 cells tend to align to the direction of laminar flow so the uropodium appears as a protrusion  
202 that is aligned to plane of the 2D image of the cell. The bright field (Ch01) default mask  
203 (M01) was first eroded, either by 2 pixels or, when a significant number of images contained  
204 a lot of extraneous material (as seen at the bottom right of the example shown), by using an  
205 80% adaptive erode (a) followed by a 5 pixel dilation, to generate a “clean” cell mask (b).  
206 The nuclear mask was then made using the morphology function of the DNA (eg. 7AAD,  
207 Ch05, mask M05, shown in c). The uropodium mask (f) was defined as the largest area single  
208 component of the clean cell mask (b) after subtraction of the nuclear mask (c) dilated by 6  
209 pixels (d). **B-G**: Image gating strategy for defining cells with uropodia. Images were gated for  
210 focus (**B**), size (bright field area) and non-apoptotic (low bright field contrast) (**C**). Note that  
211 it is essential that images are gated on diploid (ideally G<sub>0</sub>/G<sub>1</sub> DNA staining intensity) with an  
212 aspect ratio >0.8 (ie a single, round nucleus) (**D**). Dead cells staining with live/dead aqua  
213 were excluded (**E**). The area of the uropodium mask for each image was then plotted on a  
214 frequency histogram (with a log scale for uropodium area) and cells with uropodium areas  
215 greater or less than 10 $\mu$ m<sup>2</sup> were defined as uropodia positive (red) or negative (blue),  
216 respectively (**F**). The uropodium mask was also used to calculate the proportion, as a  
217 percentage, of any stains of interest (calculated as 100 x intensity of stain within uropodium  
218 mask/total stain intensity: an example is shown for mitochondria in **G**).

## 219 **2.8 Flow imaging analysis of mitotic cells in telophase**



220 We did not use any mitotic inhibitors to enhance the frequency of cells in telophase as these  
221 risk inducing asymmetric artefacts in mitotically arrested cells (37). Cell images were gated  
222 for focus and live cells as above. The strategy for making masks (blue shading) to identify  
223 and determine the polarity of telophase cells is shown in **Figure 1H**. A cell mask was made  
224 by eroding the default bright field mask (M01) by 2 pixels (a). A nuclear mask was  
225 generated by applying the morphology function to the default DNA channel (eg. Ch02, M02  
226 for Sytox Green shown). The component function (Component 1 and 2 sorted for largest  
227 area) was then used to identify the DNA staining for the two condensed sister nuclei (c, d)  
228 which were dilated by 8 pixels (e, f) and then each was subtracted from the cell mask (a) to  
229 give the two sister “cell masks” (g, h). The gating strategy to identify cells in telophase (and  
230 late anaphase) is shown in **Figure 1 I-N**. Images were gated for focus (**I**), size (bright field  
231 area) and non-apoptotic (low bright field contrast) (**J**), singlet cells with G<sub>2</sub>/M DNA content  
232 (**K**) and live cells excluding live/dead aqua (not shown). Cells in late anaphase and telophase  
233 were selected by gating for images with two nuclear components of similar DNA stain  
234 intensity (**L**) and low aspect ratios (ie. with condensed “bar” shaped nuclei: **M**), with  
235 examples shown in **N** (DNA in blue, mitochondria in red and CD4 in green). A polarity  
236 score (with 0 = equal distribution and 100 = all staining within one half) was calculated as:

$$237 \text{ Polarity (\%)} = 100 \times \frac{\text{ABS (component 1 staining - component 2 staining)}}{\text{(component 1 staining + component 2 staining)}} \\ 238$$

239 Nuclear intensity was calculated using the intensity feature subject to the nuclear  
240 (morphology) mask.

## 241 **2.9 Statistics**

242 Statistical analyses used Prism v 7 (GraphPad) to determine 2 tailed P values by unpaired t  
243 test with Welch’s correction to compare 2 groups or ANOVA with Dunnet’s multiple  
244 comparison post-test where there were more than 2 groups. Unless otherwise stated, error  
245 bars indicate SD. Summary statistics are presented as median values (eg. median  
246 fluorescence intensity: MFI), and, where appropriate, a robust CV (%) is indicated.

247 Mean numbers of cell divisions (Divs) was calculated as:

$$248 \text{ Divs} = \log_2(\text{Geomean}[\text{CTV}_{\text{undivided cells}}]/\text{Geomean}[\text{CTV}_{\text{all cells}}])$$

249

## 250 **2.10 Data availability**

251 Complete original raw image, compensated image, compensation matrix and IDEAS data  
252 analysis files for all datasets presented are available from the corresponding author upon  
253 request.

254

255  
256  
257

**Table 1: Fluorescent reagents for Imaging Flow Cytometry**

| ISX         | Stain Type              | Reagents used                                                                          |
|-------------|-------------------------|----------------------------------------------------------------------------------------|
| <i>Ch1</i>  | <i>N/A</i>              | <i>Bright field camera 1</i>                                                           |
| Ch2         | Fix/Perm                | AlexaFluor488 Mouse anti-Tbet (BD Pharmingen 561266)                                   |
| <b>Ch2</b>  | <b>Fix/Perm</b>         | <b>Rabbit mAb anti-phospho-S6-AlexaFluor488 (Cell Signaling Technology #4854)</b>      |
| Ch2         | Fix/Perm                | Rabbit mAb anti-pan AKT-AlexaFluor488 (Cell Signaling Technology #5084S)               |
| Ch2         | Fix/Perm                | Rabbit mAb anti-pAKT <sub>T308</sub> -AlexaFluor488 (Cell Signaling Technology #2918S) |
| Ch2         | Fix/Perm                | Mouse anti-gamma tubulin-AlexaFluor488 (clone TU-30: EXBIO A4-465-C100)                |
| Ch2         | Brefeldin/Perm          | Rat anti-mouse IL2-FITC (BD Pharmingen 554427)                                         |
| Ch2         | Live cell               | Rat anti-mouse CD11a/LFA-1-FITC (eBioscience 11-0111-85)                               |
| Ch2         | Fix/Perm                | AlexaFluor488 Rat anti-mouse GITR (BioLegend 120211)                                   |
| Ch2         | Fix/perm                | FITC anti-mouse Fas (BD Pharmingen 15404D)                                             |
| Ch2         | Fix/Perm                | SYTOX Green (DNA) (Life Technologies S7020)                                            |
| Ch2         | Live/Fix/Acquire        | Autophagy Green Detection Reagent (Abcam 139484)                                       |
| <b>Ch3</b>  | <b>Fix/Perm</b>         | <b>Rabbit mAb anti-pAKT<sub>S473</sub>-PE (Cell Signaling Technology #5315S)</b>       |
| Ch3         | Fix/Perm                | Anti-human/mouse GATA3-PE (eBioscience 12-9966-42)                                     |
| Ch3         | Fix/Perm                | Anti-human/mouse IRF4-PE (eBioScience 12-9858-82)                                      |
| Ch3         | Fix/Perm                | Anti-mouse granzyme B-PE (eBioscience 12-8898-82)                                      |
| Ch3         | Brefeldin/Perm          | Rat anti-mouse IFN $\gamma$ -PE (BD Pharmingen 554412)                                 |
| Ch3         | Live cell               | PE anti-mouse/rat CD29 (BioLegend 102208)                                              |
| Ch3         | Live cell               | PE anti-mouse FasL (eBioscience 12-5911-82)                                            |
| Ch3         | Fix/Perm                | Mouse anti-human Ki67-PE (BD Pharmingen 51-36525X)                                     |
| <b>Ch4</b>  | <b>Live or fix/perm</b> | <b>PE-CF594 rat anti-mouse CD4 (BD Horizon 562314)</b>                                 |
| Ch4         | Fix/Perm                | PE-CF594 anti-ROR $\gamma$ t (BD Horizon 562884)                                       |
| Ch4         | Brefeldin/Perm          | PE-CF594 anti-IL4 (BD Horizon 562450)                                                  |
| <b>Ch5</b>  | <b>Fix/Perm</b>         | <b>7AAD (DNA) (Sigma A9400-5MG)<sup>a</sup></b>                                        |
| Ch5         | Fix/Perm                | Mito-ID-Red (Enzo ENZ-51007-500) <sup>a</sup>                                          |
| <b>Ch6</b>  | <b>Fix/Perm</b>         | <b>PE/Cy7 rat anti-mouse Foxp3 (eBioscience 25-5773-82)</b>                            |
| Ch6         | Live cell               | PE/Cy7 anti-CD27 (eBioscience 25-0271-82)                                              |
| <b>Ch7</b>  | <b>Live cell</b>        | <b>Cell Trace Violet (CTV: Invitrogen C34557)</b>                                      |
| <b>Ch8</b>  | <b>Live cell</b>        | <b>Fixable LIVE/DEAD Aqua (Life technologies L34957)</b>                               |
| <i>Ch9</i>  | <i>N/A</i>              | <i>Bright field camera 2</i>                                                           |
| <b>Ch10</b> | <b>Live cell</b>        | <b>Rat anti-mouse CD62L Brilliant Violet 605 [“BV605”] (BioLegend 104437)</b>          |
| Ch10        | Live cell               | Anti-mouse CD25 Brilliant Violet 605 (BioLegend 102036)                                |
| Ch10        | Fix/Perm                | Rat anti-mouse Tbet Brilliant Violet 605 (BioLegend 644817)                            |
| Ch10        | Brefeldin/Perm          | Rat anti-mouse IL17 Brilliant Violet 605 (BioLegend 506927)                            |
| <b>Ch11</b> | <b>Live cell</b>        | <b>Mitotracker Deep Red FM (MitoDR: Invitrogen M22426)</b>                             |
| <b>Ch11</b> | <b>Fix/Perm</b>         | <b>Anti-NFkB p65 AlexaFluor 647 (Abcam ab 190589)</b>                                  |
| <b>Ch12</b> | <b>Live cell</b>        | <b>Anti-human/mouse CD44 APC-eFluor780 (eBioscience 47-0441-82)</b>                    |
| Ch12        | Live cell               | Anti-mouse CD4 APC-Cy7 (Biolegend 100526)                                              |
| Ch12        | Fix/perm                | Anti-mouse CD3 $\epsilon$ APC-Cy7 (BD Pharmingen557596)                                |
| Ch12        | Live cell               | Anti-mouse CD25 APC-eFluor780 (eBioscience 47-0251-82)                                 |

258 Lasers powers: 405nm (50mW), 488nm (100mW), 560nm (**OFF**), 642nm (100mW), SSC (**OFF**)

259 <sup>a</sup> 7AAD or Mito-Id-Red must be excited by 488nm to give weak emission in Ch4 and Ch5, so that

260 compensation can be achieved with strong emission of PE-CF594 in Ch4.

261 **Reagents in bold show the most frequently used combination for 10 colour staining panel.**

262

### 263 3. Results

#### 264 3.1 Optimisation of an *in vitro* system for the activation and differentiation of naïve 265 CD4<sup>+</sup> T cells

266 A number of publications have described *in vitro* cultures for following T cell fate decisions  
267 after antigen stimulation, where the effector and memory cell fates can be distinguished by  
268 differences in the surface expression of CD4 or CD8, differential PI3k/mTOR signalling, and  
269 numbers or activity of mitochondria (9, 13, 38). We used these observations to guide the  
270 optimisation of an experimental setup summarised in Figure 2A. TCR transgenic, RAGKO  
271 mice provided monoclonal populations of uniformly naïve CD4<sup>+</sup> T cells that could be  
272 analysed in detail after stimulation by their cognate antigen (the male antigen Dby). The  
273 A1RAG strain (31) used for most of the *in vitro* studies reported here, has a low affinity TCR  
274 expressed on the CBA/Ca background, but we also reproduced our findings with the  
275 Marilyn.hCD2-Foxp3 (MARKI) strain (21) which has a TCR affinity approx. 10 times higher  
276 (ie. requires 10 fold less peptide to achieve an equivalent response) and is on the C57BL/6  
277 background.

278 Purified CD4<sup>+</sup> T cells were cell trace violet (CTV) labelled and stimulated *in vitro* with bone  
279 marrow derived dendritic cells (bmDC) and their cognate antigen (Dby) peptide (21, 31). We  
280 compared their responses to an antigen presenting cell free stimulation by anti-CD3 plus anti-  
281 CD28 coated beads. At the end of the primary culture, cells were stained for mitochondria  
282 (Mitotracker DR), with conventional antibody labelling for cell surface CD4, plus  
283 intracellular staining for pS6 as an indication of mTOR activation. We used both  
284 conventional flow cytometry and imaging flow cytometry for analysis, with similar results, to  
285 determine the optimal conditions for both mTOR activation and to identify conditions where  
286 we could observe a similar bimodal distribution of CD4, mTOR activation and mitochondria  
287 to that previously described (9, 13, 38). Although standard RPMI+10% FCS culture medium  
288 initially supported these observations, we found poor reproducibility especially with different  
289 serum batches. For this reason, we moved to a more defined medium formulation (Advanced  
290 RPMI) before further optimisation. An example optimisation experiment is shown in Figure  
291 2B-D which examines some of the requirements of the tissue culture conditions, in this case  
292 titrating the concentration of FCS, together with the addition of both IL-2 and TGFβ. Section  
293 3.10 gives further details on the role of these two cytokines. Analysis was performed on day 3  
294 (before nutrient depletion and intrinsic mTOR inhibition take place). Under these conditions,  
295 1% FCS (as indeed recommended by the medium manufacturer) was optimal for both  
296 bimodal mitochondria staining (Figure 3C) and maximal pS6/mTOR activation (Figure 2D).  
297 This required bmDC/Dby peptide stimulation (at a previously determined optimal  
298 concentration of 100nM for A1RAG T cells) while such bimodality was never observed with  
299 anti-CD3/CD28 beads under any conditions tested. Note that while TGFβ suppressed  
300 proliferation after CD3/CD28 stimulation (39), its addition gave a more reproducible bimodal  
301 mitochondria staining with improved cell proliferation and survival when T cells were  
302 stimulated with bmDC plus antigen. The addition of TGFβ also allowed us to compare fate  
303 decisions of conventional and regulatory T cell subsets.

304 The bimodal mitochondrial distribution was found to be dependent on robust mTOR  
305 activation, as rapamycin (mTORC1 inhibitor), Torin 1 (an inhibitor of total mTOR ATP-  
306 dependent activity) and amino acid starvation (30) all reduced the bimodality towards a  
307 uniform single peak (Figure 2E-F). The proportion of cells with uropodia and the uropodium  
308 area were also reduced by mTOR inhibition, although not completely (Figure 2G).



### 309 **3.2 Optimisation of fixation and staining for imaging flow cytometry**

310 Even with this optimised *in vitro* culture system, we still encountered issues of  
311 reproducibility in the staining. We were unable to find any cells with the very distinctive  
312 morphology of telophase – although we found images with some features of late cytokinesis,  
313 but these could not be reliably distinguished from doublets and conjugates. Similarly,  
314 although we often identified cells with uropodia, the reproducibility between experiments  
315 was poor. We reasoned that both of these structural features were dependent on dynamic  
316 metabolic processes that were being disrupted during cell harvesting and staining. For this  
317 reason, we developed an “*in situ*” staining and fixation method (see methods). Figure 3 A-D  
318 compares this “*in situ*” staining/fixation at 37°C with conventional harvesting and cell  
319 staining (Mitotracker DR at room temperature then cell surface staining at 4°C), showing that  
320 only the “*in situ*” method reliably maintains both uropodia and clear bimodal mitochondrial  
321 staining. Similarly, late anaphase and telophase cells were readily identifiable if the cells  
322 were fixed/stained at 37°C *in situ* (see methods and Figure 1), but not with conventional  
323 staining at 4°C (not shown).

324

### 325 **3.3 A CD4<sup>+</sup> T cell memory response *in vivo* is associated with a bimodal distribution of** 326 **mitochondria**

327 Our *in vitro* optimisation focussed on the bimodal mitochondrial distribution in A1RAG  
328 CD4<sup>+</sup> T cells responding to antigen, but we needed to check if this remained relevant to *in*  
329 *vivo* responses. We analysed draining lymph nodes from female A1RAG mice in mice  
330 undergoing a secondary rejection of male skin grafts, where we reasoned we should see high  
331 frequencies of both effector and memory CD4<sup>+</sup> T cells. We compared this to the lack of  
332 rejection in mice previously rendered tolerant of male skin (31). Figure 4A shows the  
333 experimental design for these transplantation experiments. We had previously found very  
334 few differences in the proliferative responses or cell surface phenotypes of CD4<sup>+</sup> T cells from  
335 the draining lymph nodes of both rejecting and tolerant mice (22, 40), and here we also  
336 observed similar levels of CD4 T cell activation, as indicated by high CD44 expression  
337 (Figure 4B, C). There were, however, striking differences in the cellular distribution of  
338 mitochondria (Figure 4D). While T cells from tolerant mice had uniform numbers of  
339 mitochondria per cell, rejecting T cells had a highly reproducible bimodal distribution with  
340 two clear populations differing by approx. 5-fold in their Mitotracker DR staining (Figure  
341 4D). While this confirmed the *in vivo* relevance of the bimodal mitochondrial staining, the  
342 graft microenvironment and its interaction with the immune response (31, 40) is very difficult  
343 to manipulate experimentally, and harvesting, purifying and staining cells risks destroying  
344 important information related to their function, such as their nutrient status, signalling, and  
345 structural properties (as shown above). We therefore returned to the optimised *in vitro* culture  
346 system for further mechanistic investigations.

347

### 348 **3.4 Two cell fates distinguished by their differential expression of mitochondria, CD4** 349 **and uropodia.**

350 We first tested whether the two populations with high or low mitochondrial staining were  
351 transient and interconvertible, or represented two different cell fates. We did this by tracking  
352 the inheritance of mitochondria pre-labelled with Mitotracker DR (which covalently labels  
353 proteins within active mitochondria), that is then diluted as mitochondria partition into the  
354 daughter cells after division, as shown in Figure 5A, B. By additionally labelling for total

355 mitochondria with a different dye (Mito-ID-red) after fixation at the end of the experiment,  
356 we could determine whether the cells with high or low mitochondria were generated by a  
357 differential inheritance (ie. whether there was any deviation between Mitotracker DR and  
358 CTV dilution during cell proliferation), and whether there was any mixing or interconversion  
359 between the two populations. The high Mito-ID-red staining (total mitochondria) population,  
360 which were also those with large uropodia (Figure 5E), showed a regular two-fold dilution of  
361 the Mitotracker DR stain with each cell division (Figure 5F). In contrast, the population with  
362 low Mito-ID-red staining did not develop significant uropodia, showed a considerable loss of  
363 Mitotracker DR staining even before the first cell division, and thereafter continued regular  
364 two-fold dilutions from this low level as cells proliferated (Figure 5G). This demonstrates  
365 that two independent cell fates had been generated even before the first cell division that can  
366 be distinguished readily by the numbers of mitochondria they possess, and this difference was  
367 maintained and inherited through subsequent cell generations.

368 Those cells without uropodia, which had also lost mitochondria before the first cell division,  
369 also lost some of their CTV staining at this same point (Figure 5H). One explanation for this  
370 combined non-specific loss of two different covalent protein stains in cells destined for just  
371 one of the two cell fates, and then only before the first cell division, might be a brief period of  
372 autophagy/mitophagy (41). Inhibitors of autophagy (chloroquin or spautin 1) compromised  
373 all T cell activation and proliferation, consequently blocking any opportunity to observe the  
374 two cell fates (not shown), but we were able to detect increased staining with an autophagy  
375 dye from 48h after stimulation, and before cell division, in the DC + Ag group (Figure 5I).  
376 This represented about half of the cells that had increased both their size (ie. blasted) and  
377 mitochondrial mass since first stimulated, but those cells destined to become memory cells  
378 showed higher levels of autophagy associated with a subsequent loss of mitochondria (and  
379 Mitotracker DR) as well as other cellular proteins (CTV label) before the first cell division.

### 380 **3.5 No role for asymmetric cell divisions in generating two cell fates**

381 When naïve T cells make an apparent binary cell fate choice during an asymmetric cell  
382 division (Figure 6A), the two daughter cells are characteristically CD4 (or CD8) high versus  
383 low (9), and differ in their numbers of mitochondria (38). The two populations generated  
384 correspond to short-lived effector versus long-term memory cells (9, 11). Controversially (6,  
385 37, 42), it is claimed that the binary nature of this fate decision is the result of an asymmetric  
386 inheritance of various transcription factors (8, 10) and signalling components that drive these  
387 diverging cell fates (13, 14). Effector and memory T cells also differ in their PI3k/mTOR  
388 signalling and metabolic profiles (12, 13, 43), although uropodium development has not  
389 previously been reported in this context. Our initial experiments had also appeared to support  
390 this asymmetric model, but during the optimisation of staining and fixation methods we  
391 realised that we had likely been misled by technical artefacts. After optimisation and flow  
392 cell imaging analysis, we could objectively and unambiguously identify (see Figure 1H-N  
393 gives the masking and gating strategy) all the images of rare cells in late anaphase and  
394 telophase (without the use of any mitotic inhibitors) and accurately measure whether any cell  
395 markers were polarised towards one daughter cell or the other (Figure 6C-O). Multiple  
396 experiments confirmed that all uropodia were lost after prophase and that there was no  
397 significant polarisation of any of the cell surface markers (CD4, CD44, CD25: Figure 6C, D,  
398 E), transcription factors (Tbet, ROR $\gamma$ t, Foxp3, IRF4, NF $\kappa$ B: Figure 6F-J) nor mitochondria  
399 (Figure 6N) at telophase, in neither the first, nor subsequent cell divisions, effectively ruling  
400 out any role for asymmetric cell divisions in our system. This is consistent with the data of  
401 Figure 5 and suggests a model where the decision to develop an effector cell fate (with

402 uropodia development) takes place before the cells enter their first division, and the two cell  
403 lineages then continue to proliferate in parallel (Figure 6B).

### 404 **3.6 Confirmation that the cells with high mitochondria have uropodia**

405 Up to this point, our identification of uropodia depended on an image mask which measures  
406 the area of any single, large protrusion beyond the regular, circular shape of the cells (2D  
407 image). It is known that functional uropodia are required for normal immune responses (28,  
408 44) and that this is associated with a specific organisation of the cell surface and cytoplasmic  
409 organelles, as summarised in Figure 7. Uropodia are also important for cell migration, when  
410 they can be found at the rear of motile lymphocytes. Mitochondria localise to the uropodium  
411 by moving along microtubules that originate from the microtubule organising centre (MTOC)  
412 at the base of the uropodium. Mitotracker DR staining was indeed localised to the rear facing  
413 uropodia by live cell video imaging of CD4<sup>+</sup> T cells being activated by DC + Dby peptide  
414 (Supplementary Video 1).

415 We confirmed that the structures we identified on the high mitochondrial staining cell  
416 population were indeed uropodia by the statistical analysis of large numbers (10-50,000 per  
417 sample) of antigen-stimulated CD4<sup>+</sup> T cell images for their shape and the expression and  
418 localisation of other cell components (Figure 8A-N). More than half of all the uropodia  
419 showed clear staining at their base for the MTOC ( $\gamma$ -tubulin: Figure 8A, C), and were high in  
420 CD44, 37% of which, on average, was located on the uropodium surface (Figure 8F, K).  
421 Uropodia also contained 50% of all the mitochondrial staining (Figure 8E, J). In the cells  
422 with uropodia, CD4 expression was also much higher and localised to the uropodium surface  
423 (Figure 8G, L). As shown above, uropodium development was associated with robust mTOR  
424 activation and both mTORC1 (pS6) and mTORC2 (pAKT<sub>S473</sub>) (45, 46) levels were higher in  
425 the cells that developed them (Figure 8H, I), with the latter mostly localised within the  
426 uropodium (Figure 8N).

427

### 428 **3.7 Cell fate choice is stochastic and dependent on both mTORC1 and mTORC2** 429 **signalling**

430 We found that across a wide range of Dby peptide concentrations (Figure 9A, B; only two  
431 extremes shown), two distinct populations of cells developed, one bearing uropodia and the  
432 other lacking them, based on their measured area (Figure 9F, G). The fact that we observed  
433 two discrete populations of cells (either with or without uropodia rather than a continuum of  
434 increasing uropodium size) suggests that individual T cells were still making a binary fate  
435 decision, but in a manner that was stochastic and not determined by cell division. The chance  
436 of an individual T cell developing an uropodium seemed to depend on the strength of  
437 signalling through the mTOR pathway (as shown above, Figure 2G) which led us to seek  
438 evidence of discrete signalling states within this pathway that were associated with  
439 uropodium development. Mathematical models suggest mechanisms by which such discrete  
440 and stochastic signalling states may arise without pre-existing heterogeneity (47). When we  
441 simultaneously stained for both mTORC1 (pS6) and mTORC2 (pAKT<sub>S473</sub>) signalling (48),  
442 we reproducibly found a total of 6 distinct populations: 3 with weak/negative, intermediate or  
443 high mTORC1 staining, differing from each other by an order of magnitude, with each of  
444 these 3 populations further split into either mTORC2 positive or negative cells (Figure 9A-E).  
445 Cells with uropodia were found predominantly within the mTORC2 positive population that  
446 were mTORC1 intermediate (Figure 9F, G). The distribution of all CD4<sup>+</sup> T cells across these  
447 6 populations depended on the concentration of antigen/TCR stimulation, which mainly  
448 increased mTORC1, while mTORC2 signalling required antigen presenting cells (bmDC:

449 Figure 9C, D). Further analysis of the localisation of pAKT<sub>S473</sub> confirmed that it was  
450 specifically mTORC2 signalling that was localised to the uropodia rather than total AKT  
451 (Figure 9K, L, M) or PI3K signalling through pAKT<sub>T308</sub> (not shown). The bmDC could  
452 provide some mTORC2 signalling independent of TCR stimulation (Figure 9E). We also  
453 found that total NFκB p65 was strongly up-regulated with DC + antigen (Figure 9Q) in all  
454 cells, but a specific increase in the nuclear localisation of NFκB, indicating signalling, was  
455 highest in the cells lacking uropodia (Figure 9R). Note that NFκB signalling is thought to be  
456 important for memory cell differentiation and maintenance (49). CD3/CD28 bead  
457 stimulation, by comparison, was poor at upregulating total or nuclear NFκB (Figure 9Q, R),  
458 despite inducing strong cell proliferation (Figure 9P).

### 459 **3.8 Development of uropodia before the first cell division depends on mTORC2** 460 **signalling via GITR**

461 We wondered which ligands on the DC might be providing the additional “co-stimulation”  
462 that could increase both mTORC2 and NFκB signalling compared to CD3/CD28 beads and at  
463 the same time, promote the cell fate decision and development of uropodia. It has been  
464 shown that some members of the TNFR family, ligands for which are known to be present on  
465 DCs (35), can signal via mTORC2 as well as through NFκB (46, 50). One member of the  
466 TNFR family that is upregulated rapidly upon T cell activation is GITR (TNFRSF18) while  
467 its ligand (GITRL; TNFSF18) is well expressed on bmDC (35, 51). GITR activation by its  
468 ligand, or by cross-linking with an agonistic antibody, acts to co-stimulate T cells at  
469 intermediate levels of TCR signalling (35). We found (Figure 10A-F) that agonistic GITR  
470 antibody coated on plastic together with intermediate concentrations of anti-CD3 (plus  
471 soluble anti-CD28) gave considerable enhancement of both nuclear NFκB (Figure 10E vs B)  
472 and mTORC2/pAKT<sub>S473</sub> (Figure 10F vs C) together with increases in the number of cells  
473 with uropodia (Figure 10D vs A). Similar enhancements could be observed (Figure 10N-P)  
474 using antigen and bmDC stimulation and agonist GITR antibody in solution, where the rat  
475 IgG2b mAb (35, 36) can bind to Fc receptors on the APC for cross-linking. Furthermore, in  
476 this case where bmDC were already stimulating uropodium development, blocking of their  
477 GITRL gave a substantial loss of uropodia (Figure 10K vs H), mTORC2 signalling (Figure  
478 10M vs J) and nuclear NFκB (Figure 10 L vs I) before the first cell division (yellow  
479 histograms), when the cell fate decision normally takes place (as shown above). With  
480 continued GITRL blocking, some uropodia did develop after the first cell division (and  
481 mTORC2 and NFκB signalling partially recovered) suggesting there may be redundancy for  
482 appropriate co-stimulation at later time points, for example with other members of the  
483 TNFRSF family known to alter the balance between effector and memory cells (5, 52).

### 484 **3.9 Uropodium development is associated with terminal effector and regulatory cell** 485 **differentiation**

486 We asked if one could map the development of uropodia (or not) to a similar effector versus  
487 memory T cell fate choice as previously claimed (9, 53) to result from asymmetric cell  
488 division? Effector T cells should proliferate rapidly, be able to migrate to the site of  
489 infection/inflammation, and express transcription factors, cytokines and cytotoxic molecules  
490 appropriate to their functional T cell subset (ie. Th1, Th2 etc) and, after terminal  
491 differentiation, die. These properties were indeed most clearly associated with the cells that  
492 developed uropodia (Figures 11 and 12), although migration is only implicit to uropodium  
493 function (44) as we did not test this directly. Naïve T cells stimulated to proliferate with  
494 CD3/CD28 beads did not develop uropodia, and showed almost no induction of effector T  
495 cell subset transcription factors by day 2 (Tbet, GATA3, RORγt, Foxp3: Figure 11A, D).



496 Stimulation with antigen and bmDC induced these transcription factors, surprisingly in all  
497 possible random combinations and even before the first cell division, particularly in those  
498 cells that developed uropodia (Figure 11B, C). These cells continued to proliferate (Figure  
499 11D-F) and were functional as they also expressed similarly random combinations of  
500 cytokines (Figure 12A-F), suggesting that without any external selective pressure, this first  
501 wave of effector cells exhibit a diverse range of potential functions. A small proportion of  
502 the cells with uropodia were even co-expressing nuclear foxp3 together with effector  
503 cytokines (eg. Figure 12B), compatible with previous descriptions of foxp3<sup>+</sup> regulatory cells  
504 with some Thelper subset properties (54). Granzyme B, important for effector cell  
505 cytotoxicity (55), was also expressed (Figure 12G, H), and tended to be localised to the  
506 uropodia (Figure 12I), as previously described (44, 56). Interestingly, where nuclear foxp3  
507 was also present this localisation was reduced (Figure 12I). At later time points (day 7 of  
508 culture shown: Figure 12 J-M) there was evidence of apoptosis (increased bright field  
509 contrast) and necrosis (intracellular L/D Aqua staining, probably subsequent to apoptosis) in  
510 a population of cells which had achieved fewer divisions (average 4.7) than the viable cells  
511 (average 8.1: Figure 12 J). These expressed uropodia (Figure 12 K), more mitochondria  
512 (Figure 12 L) and higher levels of CD4 (Figure 12M), indicating that the effector cell lineage  
513 was short-lived under these conditions.

### 514 **3.10 Memory T cells make further stochastic cell fate decisions upon TCR re-** 515 **stimulation**

516 The cells in the lineage that had never developed uropodia survived and also proliferated until  
517 nutrient limitation and mTOR inhibition occurred after day 4 (days 3 and 6 shown: Figure  
518 13A-C). They continued to express high levels of both total and nuclear NFκB even on day 7  
519 (Figure 13D-F), which is thought to be important for the maintenance of memory T cells (49,  
520 57, 58). These putative memory cells continued to survive in a quiescent state until at least  
521 day 10 of culture, dependent on IL2 and promoted by TGFβ (Figure 14A-E). By this time  
522 almost all the effector cells with uropodia had died (Figure 14D, E). We harvested (on day 6)  
523 similar cultures (not previously CTV labelled) and re-stimulated them in fresh medium either  
524 with CD3/CD28 beads or DC plus antigen. As expected for memory cells, a lower threshold  
525 for activation was evidenced by the fact that CD3/CD28 beads, which were unable to induce  
526 uropodia in the primary stimulation (Figure 14I), were sufficient in the secondary stimulation  
527 to enable both proliferation and mTOR/pS6 upregulation (not shown) together with  
528 uropodium development (Figure 14G). Regardless of the secondary stimulation, we could,  
529 once again, observe two distinct populations (either with or without uropodia), suggesting  
530 that memory cells make a further “activated/effector” versus “memory/stem” cell fate  
531 decision. At the same time, while most of the cells continued to express CD44, a marker for  
532 central memory cells (CD62L) was re-expressed on about half of the re-stimulated cells,  
533 independent of whether they had developed uropodia or not (Figure 14G, H). This shows that  
534 the memory T cells, upon re-stimulation, can apparently make further stochastic,  
535 effector/memory-like fate decisions to naïve CD4<sup>+</sup> T cells. Their T helper and regulatory cell  
536 subset transcription factor expression was, however, very different to the random co-  
537 expression seen in the primary effector cells, with a much more restricted, singular pattern of  
538 either Tbet or Foxp3 in the example shown in Figure 14F.

539

## 540 **4. Discussion**

### 541 **Optimising in vitro culture conditions, fixation, staining and analytical methods**



542 Recent high-profile publications have provided evidence that effector and memory cell fates  
543 diverge very early after the activation of both CD4<sup>+</sup> and CD8<sup>+</sup> naïve T cells, both in vivo and  
544 in vitro ([11-14](#)). This divergence is claimed to depend on an initial asymmetric cell division,  
545 where one daughter cell preferentially inherits effector cell transcription factors, signalling  
546 components and a dependence on glycolysis and anabolic metabolism that drives  
547 proliferation and an effector cell fate, while the other daughter remains dependent on  
548 oxidative phosphorylation and “defaults” to a memory cell fate. The main weakness in all  
549 these publications is the difficulty in directly demonstrating the asymmetric cell divisions,  
550 with most data depending on an indirect correlation with high versus low expression of  
551 various markers, particularly CD4 or CD8, after the first cell division. Confocal imaging of  
552 apparently asymmetric telophases is limited to small numbers of selected images, with a high  
553 potential for observer bias, and may be artefactual if cells are not maintained under optimal  
554 culture conditions throughout. Imaging flow cytometry data, as we show here, can also be  
555 misleading without optimisation of the culture and staining conditions. Most of the published  
556 data assumes that an actin bridge between two cells in contact represents cytokinesis, but we  
557 have found many such images where such conjugates are clearly between two cells with  
558 different CTV dilutions, and so cannot be derived from cell division (data not shown).  
559 Disruption of microtubular dynamics, either by using mitotic inhibitors (REF) or even cell  
560 harvesting, handling, or non-physiological temperatures (as shown above) can cause  
561 asymmetric artefacts or complete loss of classical mitotic figures. Once we had optimised  
562 both the culture conditions and the fixation, staining and flow cell imaging analysis, we  
563 analysed numerous cell surface markers, transcription factors and signalling molecules across  
564 all telophase cells within multiple samples, and never found any evidence of significant  
565 asymmetry.

566

567 With the increasing realisation in the literature of the importance of T cell metabolism, we  
568 needed to better define and control the nutrient and cytokine availability, and therefore  
569 moved to a chemically defined medium with only minimal FCS. This meant that any  
570 cytokines in the culture were either those we added exogenously or derived from the antigen  
571 presenting cells, rather than being a poorly defined “background” source, as may be the case  
572 for TGFβ contributed by the higher serum concentrations of traditional culture media.  
573 Resulting from this modification it became clear that active TGFβ was important for the  
574 “balanced” generation of both effector and memory cells and their survival when stimulated  
575 by bmDC plus antigen under these low serum conditions. Active TGFβ addition also had  
576 very different effects depending on the context: with CD3/CD28 stimulation it acted as a  
577 strong inhibitor of activation and proliferation, while it had the opposite effects with antigen  
578 specific stimulation by bmDC.

579

## 580 **Mechanisms of effector versus memory cell fate decisions**

581 One school of thought has been that memory cells emerge as survivors from the expanded  
582 pool of effector cells, either due to a switch in the cytokines that support their proliferation or  
583 survival, from IL-2 to IL15 ([59](#)) or as a result of additional co-stimulatory signals from  
584 TNFRSF members ([5](#), [52](#)) such as CD27 and OX40 (CD134). Our experimental system uses  
585 medium with only 1% serum, so any cytokines come from the activated T cells themselves,  
586 are added exogenously, or come from the antigen presenting dendritic cells. Proliferation was  
587 entirely IL2 dependent, whether we stimulated with DC or CD3/CD28 beads, as a  
588 neutralising anti-IL2 antibody (S4B6) blocked full activation (cells expressed high CD25 but

589 not CD44) and entry into cell division (Figure 14C). For routine experiments we added  
590 sufficient exogenous IL2 such that intrinsic IL2 production would not be a confounding  
591 variable to consider. The further addition of IL15 or related cytokines (IL7, IL4) did not  
592 change the balance of uropodia expressing effector to memory cells (not shown). We also  
593 observed both effector and memory cell populations under Th1 (anti-IL4 plus IFN $\gamma$ ) or Th2  
594 (added IL4 plus anti-IL12) conditions (details not shown, although data from these conditions  
595 are shown in Figure 6). The addition of active TGF $\beta$  was required for the long-term survival  
596 of memory cells after DC + Ag stimulation, as well as any generation of foxp3<sup>+</sup> Treg cells,  
597 especially in the low (1%) serum cultures. A requirement for TGF $\beta$  for normal memory cell  
598 development in vivo has previously been reported ([49](#), [57](#), [58](#)). Uropodia development and a  
599 bimodal mitochondrial distribution occurred within the first 48 hours after stimulation, and  
600 before the initiation of cell proliferation under all the cytokine conditions that we tested.

601 This seems incompatible with memory cells deriving from a few surviving effector cells. Yet,  
602 two recent papers claim exactly that for viral specific memory cells after clinical vaccination  
603 ([60](#), [61](#)). How can this be? The first paper makes the common (but we would suggest  
604 incorrect) assumption that by labelling proliferating cells in a primary response that these  
605 were all effector cells so that if memory cells in a secondary challenge were still labelled they  
606 were presumed to derived from them. But we show here that during the primary response the  
607 committed memory population are proliferating in parallel to the effector cells. The second  
608 paper makes the same assumption and additionally finds that memory cells share some of the  
609 epigenetic signature of effector cells, so erroneously claims that memory cells are de-  
610 differentiated effectors. But we show that the optimal initial activation of naïve CD4<sup>+</sup> T cells  
611 can induce multiple T cell effector and regulator transcription factors, which would likely  
612 leave an epigenetic signature in cells destined to become both effector and memory T cells.

613 A different view has been that the effector/memory cell fate decision is deterministic and  
614 binary, with an extreme example being where an asymmetric cell division generates two  
615 daughters, one proliferating to generate effector cells while the other is committed to the  
616 memory cell lineage. Our data has similarity to this latter view, except that we did not  
617 observe a one-to-one binary fate decision, nor was there any evidence for any asymmetric  
618 cell division. Why might this be? We did not use any mitotic inhibitors in our cultures, as  
619 these are known to generate artefactual asymmetry during cytokinesis ([37](#)). By fixation at  
620 37°C we “froze” any cells in late anaphase/telophase rather than allowing lower temperatures  
621 ([62](#)), centrifugation or nutrient starvation to disrupt cell structure or cause mitotic spindle  
622 collapse which might generate artefactual asymmetry. One limitation was that we were also  
623 unable to stain for numb or notch, claimed to be the drivers of asymmetric cell division ([63](#),  
624 [64](#)), as a number of commercially (polyclonal) available antibodies gave no cell surface  
625 staining above background in our hands, and staining for notch signalling with a monoclonal  
626 anti-NICD was also unhelpful (not shown). Notwithstanding this limitation, we found that  
627 that the effector lineage was tightly linked to uropodium development before any cell  
628 division, and while both lineages were generated across a wide range of conditions, the  
629 proportion of effector versus memory cells was regulated in a non-linear manner by  
630 signalling through both TCR/CD28, acting primarily through PI3K on mTORC1, but also by  
631 GITR (TNFRSF18) signalling via mTORC2/pAKT<sub>S473</sub> and NF $\kappa$ B. Independently, we found  
632 that GITR/mTORC2 signalling and uropodium development were associated with an early  
633 (pre-division) induction of random combinations of transcription factors for T helper and  
634 regulatory cell subsets, which generate an early cohort of poly-functional effector cells. GITR  
635 signalling via mTORC2 was important for uropodium expression and effector cell  
636 commitment, but it also led to increased expression of NF $\kappa$ B in all CD4<sup>+</sup> T cells. NF $\kappa$ B  
637 localisation to the nucleus, however, was seen primarily in the long-lived memory cells. This

638 dual role of GITR co-stimulation suggests it might promote the decision process rather than  
639 the actual choice of cell fate. The decision to develop uropodia was independent of T cell  
640 subset differentiation, and nuclear foxp3-expressing Treg cells were similarly distributed  
641 amongst the uropodia positive and negative populations at this early time point, suggesting  
642 they too can commit to either an activated/effector or long-lived memory lineage. The Tregs  
643 within the effector or memory populations were mTOR/pS6 high or low, respectively, which  
644 may explain some of the discrepant reports concerning the status of mTOR in Tregs (65).

#### 645 **A role for mTOR signalling in cell fate decisions**

646 It has been suggested that mTORC1 and mTORC2 signalling are important for Th2 versus  
647 Th1 differentiation, while Tregs develop in the absence of both pathways (66-69). Most of  
648 this type of data has been generated using genetic manipulations that completely knock out  
649 one or more components of the PI3k/mTOR pathway in T cells, but this fails to take into  
650 account that these pathways do not act in a digital fashion but rather they integrate multiple  
651 inputs and feedback elements to produce more complex outcomes, as we observed in Figure  
652 9 and (70). For uropodium development, for example, this requires an intermediate level of  
653 mTORC1/pS6 but high mTORC2/pAKT<sub>473</sub>, and yet developing Th1, Th2 and Treg seem to  
654 be roughly equally distributed amongst the uropodia positive and negative populations on  
655 day3, suggesting the mTOR signalling requirements for different T cells subsets may be  
656 similar initially. At later time points, nutrient utilisation leads to mTOR inhibition,  
657 conditions which may then select for the differential growth and survival of, for example,  
658 regulatory rather than inflammatory T helper cell subsets. It is also possible that the 6  
659 discrete mTORC1/mTORC2 signalling populations (Figure 9) are associated with specific T  
660 helper and regulatory cell subset differentiation, but we are currently limited by the  
661 combinations of reagents and number of fluorescent channels on the ImageStream to test this.

#### 662 **Autophagy, mitophagy and cell fate**

663 Autophagy is the process by which all cells are able to recycle their cellular components and  
664 organelles, including mitochondria (ie. mitophagy), particularly under conditions of stress  
665 and nutrient starvation. Autophagy is inherently linked to the mTOR pathway and metabolic  
666 status of the cell, and has been implicated in controlling immune cell differentiation (41). Our  
667 data suggest that autophagy may be involved in the effector versus memory cell fate decision,  
668 as we observed loss of both Cell Trace Violet (which permanently and non-specifically labels  
669 intracellular proteins) and Mitotracker DR (which permanently labels intra-mitochondrial  
670 proteins) when cells had been pre-labelled with both dyes, and this occurred only after  
671 activation (increase in size), before entry into the first cell division, and only with DC plus  
672 antigen stimulation. In addition, we could observe staining with a dye that specifically labels  
673 late autophagic vesicles at this same time point, at around 48 hours after stimulation with DC  
674 + Dby peptide, but not in CD3/CD28 bead stimulated cultures (where we do not see  
675 generation of the two cell fates). mTOR inhibition by rapamycin usually induces autophagy  
676 in actively growing cells, but in this case we observed reduced staining for autophagy,  
677 probably because the primary effect of mTOR inhibition was to reduce and delay the T cell  
678 activation required before autophagy could occur. We could not formally prove, however,  
679 that the cell fate decision depended specifically on autophagy, as the use of inhibitors such as  
680 chloroquin and spautin 1 also blocked T cell activation and proliferation.

#### 681 **Cell fate decisions after secondary stimulation of memory cells**

682 In our in vitro cultures, nutrient depletion and consequent mTOR inhibition became dominant  
683 after 3-5 days of cell proliferation. During this period, effector cells with uropodia died, but  
684 could still be observed as cells with reduced DNA staining, increased bright field contrast and

685 live/dead aqua staining, and with a CTV dilution equivalent to an average of 4.2 cell  
686 divisions (Figure 12J). Developing memory cells without uropodia, however, continued to  
687 proliferate (more than 8 cell divisions by CTV dilution: Figure 12J), became quiescent (as  
688 indicated by loss of pS6 staining: Figure 13B), but remained viable and still expressing  
689 nuclear NFκB until at least day 10 after stimulation. More importantly, they could be harvested,  
690 labelled with CTV and re-stimulated, either with CD3/CD28 beads or DC + antigen, to  
691 induce a second round of activation and proliferation. Interestingly, around half of the re-  
692 activated cells now developed uropodia, regardless of the stimulation (naïve CD4<sup>+</sup> T cells did  
693 not develop uropodia with CD3/CD28 bead stimulation alone), suggesting they could re-  
694 capitulate the effector versus fate decision of naïve CD4<sup>+</sup> T cells to generate “effector  
695 memory” and what might be considered a central memory “stem” cell (71). At the same time,  
696 around half of the re-activated memory CD4<sup>+</sup> T cells re-expressed CD62L (which had been  
697 lost from naïve T cells after activation) while they remained CD44<sup>+</sup>, compatible with a  
698 central memory phenotype. The re-expression of CD62L and the development of uropodia  
699 were randomly associated, suggesting these further cell fate decisions were stochastic in  
700 nature. Secondary stimulation of memory cells seemed to only give a restricted expression of  
701 T cells subset transcription factors, compared to the random co-expression seen on  
702 stimulation of naïve T cells. Preliminary experiments outside the main scope of this paper  
703 suggest that a cytokine, and mTOR signalling dependent, selection process may operate  
704 during memory cell proliferation and development.

#### 705 **Implications of the model for peripheral Treg development and tolerance**

706 We found a clear bimodal distribution of mitochondrial numbers within CD4<sup>+</sup> T cells in  
707 rejecting mice, while tolerant mice only had a single population with high numbers of  
708 mitochondria. It is generally thought that effector cells require glycolysis, while memory and  
709 regulatory T cells use oxidative phosphorylation - this might suggest that the rejecting mice  
710 might have both effector and memory T cells in their secondary response, while tolerant mice  
711 might lack the glycolytic, low mitochondrial effector population, and have only the  
712 regulatory T cells we know are required to maintain tolerance (21). There are, however very  
713 few foxp3<sup>+</sup> Treg cells in the draining lymph nodes of these secondary challenge, tolerant  
714 mice as they are likely all within the graft itself (40), and there are similar numbers of  
715 CD44<sup>+</sup> activated T cells (Figure 4). The in vitro model also shows that it is the effector cells  
716 (with uropodia) that correspond to the high mitochondrial containing population, and that the  
717 low mitochondria cells that are missing in tolerant mice are more likely to be memory cells.  
718 We also showed many years ago that mice tolerant of a skin graft have an increased, rather  
719 than decreased, frequency of circulating (splenic) effector Th1 and Th2 cells (22). Taken  
720 together, the immune “defect” in tolerant mice would correspond to a lack of memory cells,  
721 so that a secondary challenge only elicits a short-lived, primary-like effector cell response in  
722 the circulation that can be adequately controlled by the regulatory foxp3<sup>+</sup> T cells residing  
723 within the tolerated skin graft tissue.

#### 724 **Metabolism and cell fate decisions – cause or effect?**

725 We know that there seems to be a strong link between effector T cells and glycolysis,  
726 compared to memory cells and regulatory T cells, which are more dependent on oxidative  
727 phosphorylation and fatty acid metabolism. The Advanced RPMI medium we used should  
728 provide, at least initially, an excess of metabolic precursors for all the different pathways. It  
729 contains a defined content of fatty acids, known to be important for effective memory cell  
730 differentiation/survival (23, 24, 72), insulin to ensure effective glycolysis thought to be  
731 important for effector cells (15, 73), and a non-labile source of glutamine (important as a  
732 carbon source for proliferating T cells). Even so, we found that mTORC1 (pS6) signalling



733 peaked on day 2 (MARKI) or 3 (A1RAG) of culture, after which nutrient limitations  
734 increasingly led to mTOR inhibition, apoptosis in the effector cells and a reduction in the rate  
735 of memory cell proliferation. We found that uropodia-positive effector cells were higher in  
736 both mTORC1 and 2, which would be expected to drive anabolic metabolism, glucose uptake  
737 and glycolysis. Conversely, memory cells without uropodia were generally very low/negative  
738 for mTORC2 and lower in mTORC1, which would normally be an indication of catabolism,  
739 autophagy and OXPHOS (74, 75). It was the effector cells with uropodia, however, which  
740 had the higher numbers of mitochondria that stain with Mitotracker DR (that depends on an  
741 active electron transport chain), suggesting they may also be active in OXPHOS. We have  
742 investigated in some detail the metabolism of these cells committed to either effector or  
743 memory cell fates as they developed, but to describe these data in any detail is beyond the  
744 scope of this current paper. In particular, it remains an important question whether changes in  
745 T cell metabolism that correlate with different differentiation pathways and cell fates are  
746 causative or whether they are a result of different metabolic needs, and if the latter, whether  
747 the nutrient status of different microenvironments act in a selective manner. We will address  
748 these issues in a follow up paper (manuscript in preparation).

749 This new *in vitro* model system will enable us to examine how different cytokines, nutrients  
750 and other mediators skew responses towards alternative T helper and regulatory subsets as it  
751 can distinguish between their relative roles in induction/commitment versus  
752 proliferation/selection/survival with important implications for potential therapeutic  
753 interventions aimed at manipulating the microenvironment.

## 754 **5. Acknowledgments**

755 We would like to thank the PSB staff for their support with animal care, Nigel Rust for  
756 assistance with cell sorting and Annemieke ten Bokum for technical assistance. This work  
757 was supported by the MRC UK (Program Grant), the EPA Abraham Trust and the European  
758 Research Council (PARIS).

## 759 **6. Author contributions**

760 SPC designed and analysed flow imaging experiments and wrote the manuscript.  
761 EA set up and planned *in vitro* culture and *in vivo* grafting experiments.  
762 DH helped design experiments with mitochondria and writing the manuscript.  
763 HW holds grants that funded this research and contributed to experimental design and writing  
764 of the manuscript.

## 766 **7. Conflicts of interests statement**

767 The authors have no conflicts of interest.

768



769 **Figure legends**

770

771 **Figure 1: Masking and gating strategies for analysis of uropodia and cells in telophase**

772 The strategy for making masks (blue shading) for nuclear expression and identification of  
773 uropodia is shown in **A**. The bright field (Ch01) default mask (M01) was first eroded, either  
774 by 2 pixels or, when a significant number of images contained a lot of extraneous material (as  
775 seen at the bottom right of the example shown), by using an 80% adaptive erode (a) followed  
776 by a 5 or 6 pixel dilation, to generate a “clean” cell mask (b). The nuclear mask was then  
777 made using the morphology function of the DNA (7AAD, Ch05, mask M05, shown in c).  
778 The uropodium mask (f) was defined as the largest area single component of the clean cell  
779 mask (b) after subtraction of the nuclear mask (c) dilated by 6 pixels (d). **B-G**: Image gating  
780 strategy for defining cells with uropodia. Images were gated for focus (**B**), size (bright field  
781 area) and non-apoptotic (low bright field contrast) (**C**). Note that it is essential that images are  
782 gated on diploid (ideally G<sub>0</sub>/G<sub>1</sub> DNA staining intensity) with an aspect ratio >0.8 (ie a single,  
783 round nuclei) (**D**). Dead cells staining with live/dead aqua were excluded (**E**). The area of  
784 the uropodium mask for each image was then plotted on a frequency histogram (with a log  
785 scale for uropodium area) and cells with uropodia areas greater or less than 10µm<sup>2</sup> were  
786 defined as uropodia positive (red) or negative (blue), respectively (**F**). The uropodium mask  
787 was also used to show the proportion (%) of any stains of interest that were differentially  
788 expressed within or outside the uropodium mask (an example is shown for mitochondria in  
789 **G**). **H-N**: The strategy for making masks (blue shading) to identify and determine the  
790 polarity of telophase cells is shown. A cell mask was made by eroding the default bright field  
791 mask (M01) by 2 pixels (a). A nuclear mask was generated by applying the morphology  
792 function to the default DNA channel (Ch02, M02 for Sytox Green shown). The component  
793 function (Component 1 and 2 sorted for largest area) was then used to identify the DNA  
794 staining for the two condensed sister nuclei (c, d) which were dilated by 8 pixels (e, f) and  
795 then each was subtracted from the cell mask (a) to give the two sister “cell masks” (g, h). The  
796 gating strategy for identify cells in telophase (and late anaphase) is shown in **I-N**. Images  
797 were gated for focus (**I**), size (bright field area) and non-apoptotic (low bright field contrast)  
798 (**J**), singlet cells with G<sub>2</sub>/M DNA content (**K**) and live cells excluding live/dead aqua (not  
799 shown). Cells in late anaphase and telophase were selected by gating for images with two  
800 nuclear components of similar DNA stain intensity (**L**) and low aspect ratios (ie. with  
801 condensed “bar” shaped nuclei: **M**), with examples shown in **N** (DNA in blue, mitochondria  
802 in red and CD4 in green).

803

804 **Figure 2: Optimisation of an in vitro culture system of antigen specific stimulation that**  
805 **recapitulates the bimodal distribution of mitochondria observed in vivo.**

806 **A**: Schematic of an in vitro system to track the activation, proliferation and differentiation of  
807 naïve CD4<sup>+</sup> T cells at different time points after a primary stimulation, and after a secondary  
808 activation. **B-D**: Naïve CD4<sup>+</sup> T cells from A1RAG mice were labelled with Cell Trace Violet  
809 (CTV) and stimulated in vitro with either bmDC plus 100nM Dby peptide or CD3/CD28  
810 beads (blue lines), in the presence of IL-2, TGFβ and ATRA, for 3 days in Advanced RPMI  
811 with either 1% (red lines), 5% (orange lines), or 10% FCS (yellow lines) followed by “in  
812 situ” staining (see methods) for Mitotracker DR, live/dead Aqua, CD4-PE-CF594 and CD44-  
813 APC-eflour780, fixation/permeabilisation, followed by intracellular pS6-Alexa488 and  
814 7AAD staining. ImageStream analysis was performed on 30,000 images per sample, gating

815 on singlet cells as above, CD4<sup>+</sup> and live/dead aqua negative, and plotting CTV against  
816 Mitotracker DR (**B**: density plot of all samples pooled). Individual samples were gated on  
817 cells that had divided 1-4 times (orange box) and the intensity histograms of Mitotracker DR  
818 (**C**) and pS6 (**D**) are shown. **E-F**: CTV labelled A1RAG CD4<sup>+</sup> T cells were stimulated as  
819 above with bmDC + Dby peptide, but in standard RPMI + 10% dialysed FCS, or with RPMI  
820 with reduced levels of essential amino acids (EAAS), or with addition of mTOR inhibitors  
821 rapamycin or Torin 1, as indicated. CD3/CD28 bead stimulation was used as a control group.  
822 Mitotracker DR and live/dead aqua staining was performed at room temperature and the  
823 samples run on a Dako Cyan flow cytometer with analysis by FlowJo software. Live cells  
824 were gated on those that had divided exactly once by CTV dilution. **G**: A similar experiment  
825 to that in B-D was set up except that a DC + peptide stimulated group was treated with  
826 rapamycin, and the ImageStream analysis of uropodium area was performed as described in  
827 the methods section.

828

### 829 **Figure 3: Optimising fixation and staining methodology**

830 **A-D**: CTV-labelled naïve female A1RAG CD4<sup>+</sup> T cells were stimulated with bmDC +  
831 100nM Dby peptide with IL2, TGFβ and ATRA. Staining and fixation was performed in two  
832 different ways: either the “in situ” method at 37°C was used (**A** and red filled lines in **C, D**)  
833 or cells were conventionally harvested, spun down and labelled in PBS+1%BSA with fixing  
834 and permeabilisation all at 4°C (**B** and blue lines in **C, D**). Cells were gated and uropodia area  
835 determined as described in the methods. One of two similar experiments shown.

836

### 837 **Figure 4: Antigen specific CD4<sup>+</sup> T cells undergoing a secondary graft rejection** 838 **response have a bimodal distribution of mitochondria.**

839 **A**: Schematic of the in vivo model used to compare secondary memory responses of antigen  
840 specific CD4<sup>+</sup> T cells to a challenge skin graft after rejection or the induction of tolerance. **B-**  
841 **D**: Draining lymph nodes were taken, 7 days after a secondary challenge with male skin,  
842 from female A1RAG mice that had been either been allowed to reject a male skin graft or had  
843 been made tolerant by anti-CD4 treatment (5 mice per group). Cells from each mouse were  
844 individually stained with Mitotracker DR, CD4-PE-CF594, CD44-APC-eflour780, and  
845 7AAD and 20,000 images were acquired by ImageStream for each sample. Singlet, viable  
846 cell images were gated on 7AAD intensity (2N DNA) and high aspect ratio, bright field area  
847 and low contrast. All rejecting (**A**) and tolerant (**B**) gated images are pooled and shown in the  
848 plots, and the percentage (mean±SD) of activated CD4<sup>+</sup>CD44<sup>+</sup> T cells (within yellow gates)  
849 are indicated. The Mitotracker DR intensity of individual rejecting and tolerant CD4<sup>+</sup> gated  
850 cells (red [**B**] and blue [**C**] boxes) is plotted in **D**.

851

### 852 **Figure 5: The bimodal distribution of mitochondria represents two lineages of** 853 **proliferating cells that either do, or do not, develop uropodia before the first cell** 854 **division.**

855 **A**: Explanatory diagram showing how pre-labelling with both Cell Trace Violet and  
856 Mitotracker DR allows the tracking of mitochondrial inheritance with cell division, while  
857 post-labelling with Mito-ID-Red indicates the total number of mitochondria per cell at the  
858 end of the culture, which shows that two separate lineages of cells proliferate in parallel and  
859 do not interconvert. **B-I**: Naïve female A1RAG CD4<sup>+</sup> T cells were labelled with both CTV

860 and Mitotracker DR and stimulated with bmDC + 100nM Dby peptide with IL-2, TGF $\beta$  and  
861 ATRA, for 3 days. Cells were labelled “in situ” with CD4-APC-Cy7 and live/dead aqua,  
862 fixed and permeabilised, then stained with Mito-ID-Red and Sytox green, and 30,000 images  
863 acquired by ImageStream. All images were gated for live, singlet, G<sub>0</sub>/G<sub>1</sub> and CTV<sup>+</sup> cells.  
864 Panel **B** shows the dilution of Mitotracker DR with each cell division by CTV dilution.  
865 Panels **D-G** show histograms of the indicated parameters gated in **C** for each cell division  
866 (0=Blue, 1=green, 2=yellow, 3=orange, 4=red) with pre-division activated blast cells (high  
867 mitochondria [grey box] and bright field area >90 $\mu\text{m}^2$ ) and non-blasted cells (low  
868 mitochondria [dashed blue box] and bright field area <90 $\mu\text{m}^2$ ). Each population is further  
869 gated in panel **D** for high (green) or low (grey) total mitochondria (Mito-ID-Red stain). Panel  
870 **E** shows that the Mito-ID-Red high and low populations have either large (>10 $\mu\text{m}^2$ ) or  
871 small/no (<10 $\mu\text{m}^2$ ) uropodia respectively, with very similar proportions of each across all cell  
872 divisions. While the Mito-ID-Red high populations show a regular 2-fold dilution of the pre-  
873 stained Mitotracker DR (**F**), the Mito-ID-Red low gated cells lose most of their Mitotracker  
874 DR staining during their activation from non-blasted to pre-division blast cells (panel **G**,  
875 white arrow), with regular 2-fold dilutions to a background of 4000 after that. CTV was also  
876 lost at the same time point (panel **H**, white arrow), but returned to regular 2 fold dilutions  
877 thereafter. One of two similar experiments shown. In a separate experiment (**I**), CTV labelled  
878 A1RAG CD4<sup>+</sup> T cells were stimulated, in the presence of IL2, TGF $\beta$  and ATRA, with bmDC  
879 + Dby peptide, with (red line) or without (yellow line) rapamycin, or with CD3/CD28 beads  
880 (green line). Cultures were labelled at different time points (only 48h shown) in situ, with  
881 autophagy green detection reagent (Abcam: 1/2000), Mitotracker DR, CD4-PECF594 and  
882 CD44-APC-Cy7 for 40 mins, then fixed with 2% formaldehyde at 37°C for 15 mins. After a  
883 single wash in PBS + 1% BSA, samples were immediately run on the ImageStream. Images  
884 were gated on focussed, live, single CD4<sup>+</sup> cells with undiluted CTV staining. One of 3 similar  
885 experiments is shown.

886

887 **Figure 6: The CD4<sup>+</sup> T cell fate choice associated with uropodium development does not**  
888 **depend on asymmetric cell divisions.**

889 **A:** Depiction of a binary cell fate decision as a result of an asymmetric first cell division.  
890 The effector and memory cell fates result from a differential inheritance of mitochondria,  
891 CD4 and PI3k signalling between the two daughters. **B:** A stochastic cell fate decision to  
892 develop uropodia during initial activation and before any cell division. The chance of any  
893 individual cell becoming either an effector cell, and developing uropodia, or a memory cell  
894 without uropodia, depends on the balance of a number of interacting signalling pathways (eg.  
895 GITR, mTORC1, mTORC2, NF $\kappa$ B) during its initial activation. Symmetrical cell divisions  
896 can then take place regardless of the cell fate decision taken. **C-O:** CTV labelled naïve CD4<sup>+</sup>  
897 T cells from female A1RAG were stimulated with bmDC + 100nM Dby peptide with IL-2,  
898 TGF $\beta$  and ATRA for 48 h (when the average number of cell divisions was only 0.7). No  
899 mitotic inhibitors were used. Cultures were labelled “in situ” with (**C, L**) CD4-APC-Cy7 and  
900 CD25-BV605 or (**D, M**) CD44-APC-eflour780, plus live/dead aqua and Mitotracker DR (**C**,  
901 **E, N**), and fixed at 37°C by addition of 40% formaldehyde to 10% v/v for 15 minutes. The  
902 medium and fixative were then carefully aspirated and fix/perm buffer added for 2 hours at  
903 37°C. Intracellular stains used were (**C** and where indicated): IRF4-PE, ROR $\gamma$ t-PE-CF594,  
904 7AAD or (**D** and where indicated): Sytox Green, Foxp3-PE-Cy7, NF $\kappa$ B-p65-APC or (**E** and  
905 where indicated): Tbet-Alexa488, ROR $\gamma$ t-PE-CF594, 7AAD followed by ImageStream  
906 analysis. Telophase and late anaphase cells were automatically gated and all identified cells  
907 expressing the marker of interest are included in the histograms of polarity scores (with

908 numbers indicated). Cells in their first mitosis (ie. undiluted CTV) are indicated in yellow.  
909 Data shown is from ~600,000 images obtained by pooling 3 independent experiments (under  
910 standard, Th1 or Th2 cytokine conditions) and is representative of at least 3 similar datasets.

911

912 **Figure 7: A depiction of the uropodium structure in lymphocytes.**

913 Adapted from (44). Uropodia are found at the back of activated lymphocytes that are  
914 migrating on a substrate, usually an intracellular matrix containing integrin ligands such as  
915 ICAM-1 or fibronectin, towards a chemokine cue. The uropodium is organised as a large,  
916 finger-like projection by the cytoskeleton and microtubules, with the microtubule organising  
917 centre (MTOC) at its base. The polarisation of the cell is maintained by the Scribble/Dlg and  
918 Par3 complex, which are the same components that have been claimed to be needed for  
919 asymmetric cell divisions (10). It is thought that the uropodium is responsible for the  
920 interaction of T cells with other cells, such as antigen presenting cells and targets of  
921 cytotoxicity, and therefore expresses high levels of TCR, CD4/8 and relevant adhesion  
922 molecules (CD44, CD29). The cytotoxic granules of effector T cells are also contained within  
923 the uropodium, and cytokines are secreted from them. Mitochondria, and many other  
924 organelles are also concentrated within the uropodium, which contains the bulk of the cell  
925 cytoplasm.

926

927 **Figure 8: Confirmation that the image masking strategy used is correctly identifying**  
928 **uropodia containing high numbers of mitochondria, high CD4 and CD44 expression,**  
929 **and mTOR signalling.**

930 **A-C:** CTV-labelled naïve female A1RAG CD4<sup>+</sup> T cells were stimulated with bmDC +  
931 100nM Dby peptide with IL2, TGFβ and ATRA for 3 days. Cells were labelled “in situ” with  
932 CD4-PE-CF594, CD44-APC-Cy7, Mitotracker DR, and live/dead aqua, fixed and  
933 permeabilised, and intracellularly stained for γ-tubulinAlexaFluor488, and foxp3-PE-Cy7.  
934 Example images are shown in **A**. The distribution of nuclear foxp3 staining was identical  
935 comparing cells with or without uropodia (**B**) and γ-tubulin staining, indicating the MTOC  
936 was strongly associated with uropodia (**C**). **D-N:** CTV labelled naïve A1RAG CD4<sup>+</sup> T cells  
937 were stimulated with bmDC + 100nM peptide under optimised conditions (see methods) for 3  
938 days and then “in situ” labelled with CD4-PE-CF594, CD44-APC-eflour780, CD62L-BV605  
939 (not shown), live/dead aqua and Mitotracker DR, fixed and permeabilised, then stained with  
940 pS6-Alexa488, pAKTS473-PE, Foxp3-PE-Cy7 (not shown) and 7AAD for ImageStream  
941 analysis. All images were gated for live, singlet cells in G<sub>0</sub>/G<sub>1</sub> as previously. Example  
942 images, with uropodia masks indicated, are shown in **L**, and cells with a uropodium area  
943 greater or less than 10µm<sup>2</sup> were defined as positive (red filled histograms) or negative (blue  
944 histograms), respectively. **E-I** show the intensity histograms for each stain of interest, while  
945 **J-N** show the proportions of each stain that fall within the uropodium gate for each image.  
946 Median values for each plot are indicated. Shown are representative examples of 3 or more  
947 independent experiments.

948

949 **Figure 9: Development of uropodia is associated with strong pAKT473/TORC2**  
950 **signalling, intermediate pS6/TORC1 activity and low NFκB signalling.**



951 **A-J:** CTV labelled female A1RAG CD4<sup>+</sup> T cells were stimulated for 3 days in IL-2, TGFβ  
952 and ATRA, with bmDC while the Dby peptide was titrated from 500nM down to zero  
953 (examples shown in **A-C** and **F-H**) or CD3/CD28 beads were used as stimulation either alone  
954 (**D, I**) or together with DC but no Dby peptide (**E, J**). Cultures were labelled “in situ” with  
955 CD4-PE-CF594, CD44-APC-eflour780, Mitotracker DR and live/dead aqua, fixed and  
956 permeabilised, followed by staining with pS6-Alexa488, pAKT<sub>S473</sub>-PE and 7AAD for  
957 ImageStream analysis. Gating was for live, singlet cells in G<sub>0</sub>/G<sub>1</sub> that had not diluted their  
958 CTV (ie. before any cell division). The uropodia area distributions of the six populations  
959 gated in panels **A-E** are colour-coded and shown in the histograms of panels **F-J** respectively.  
960 Large uropodia were only induced in cells stimulated with bmDC plus Dby peptide, and  
961 where pAKT<sub>S473</sub> was high and pS6 was simultaneously intermediate or low (red boxes). One  
962 of 3 similar experiments shown. **K-M** shows a similar experimental set up (1 of 2) except that  
963 a pan-AKT-Alexa488 antibody was used in combination with the pAKT<sub>S473</sub>-PE staining,  
964 showing that total AKT was not restricted to the uropodia (example images in **K** and  
965 histogram in **L**) while pAKT<sub>S473</sub>, indicating signalling, was uropodia restricted (**M**). Median  
966 values for % within uropodia are shown. **N-R:** The experiment shown (1 of 3) used either  
967 bmDC + 100nM Dby peptide or CD3/CD28 bead stimulation, was labelled “in situ” with  
968 live/dead aqua and CD25-BV605 (not shown), fixed and permeabilised, then stained  
969 intracellularly with CD4-PE-CF594, CD3-APC-Cy7, NFκB-p65-APC, (Foxp3-PE-Cy7,  
970 CD95-FITC, not shown) for ImageStream analysis. Example images of cells with and  
971 without uropodia (stimulated by bmDC + Dby) are shown (**N**) while all live, singlet G<sub>0</sub>/G<sub>1</sub>,  
972 DC+Dby (filled blue) or CD3/CD28 bead (yellow) stimulated cells are shown in the  
973 histogram of uropodium area (**O**). Histograms of the CTV dilution profiles of bmDC  
974 stimulated cells either with (filled red histograms) or without (blue lines) uropodia, or  
975 CD3/CD28 bead stimulated cells (yellow lines) are shown in **P** with the mean number of cell  
976 divisions indicated. The intensity histograms for total NFκB-p65 (**Q**) or NFκB restricted to  
977 the nucleus (**R**) are shown with median intensity values indicated.

978

979 **Figure 10: Uropodia development before first cell division depends on GITR signalling**  
980 **through mTORC2 and NFκB.**

981 **A-F:** CTV labelled female A1RAG CD4<sup>+</sup> T cells were stimulated in the presence of IL-2,  
982 TGFβ and ATRA with either bmDC + 100nM Dby peptide (red, dashed histograms),  
983 CD3/CD28 beads (blue lines) or different concentrations (0.1μg/ml, white lines, 1.0μg/ml,  
984 green lines, or 5μg/ml, yellow lines) of anti-CD3 antibody coated on the tissue culture plastic,  
985 each concentration plus 1μg/ml anti-CD28 (37.51) in solution. In panels **D-F** an agonist  
986 antibody to GITR (YGITR 765.4) was also coated at 1μg/ml on the plastic. After 3 days,  
987 cultures were labelled “in situ” with CD4-PE-CF594, CD25-BV605, CD44-APC-eflour780  
988 and live/dead aqua, fixed and permeabilised, followed by intracellular staining for pS6-  
989 Alexa488, pAKT<sub>S473</sub>-PE, NFκB-p65-APC, and 7AAD. Images for histograms shown were  
990 gated on live, singlet, CTV<sup>+</sup>, G<sub>0</sub>/G<sub>1</sub> DNA content cells and the proportion (%) of cells that  
991 developed uropodia (>10μm<sup>2</sup>: **A, D**), stained for nuclear expression of NFκB (**B, E**) and  
992 pAKT<sub>S473</sub> (**C, F**) are indicated. One of two similar experiments shown. **G-P:** An experiment  
993 similar to that above was set up, except that all cultures were stimulated by bmDC + 100nM  
994 Dby, either alone (example images in **G**, histograms in **H-J**), or with the addition of a  
995 blocking antibody to GITRL (YGL 386: **K-M**) or an FcR-binding, agonist antibody to GITR  
996 (YGITR 765: **N-P**), both at 10μg/ml in solution. Yellow filled histograms are gated on cells  
997 which have not divided (undiluted CTV) while dashed red histograms are gated on cells that



998 have divided once or more. Median values are indicated. One of two similar experiments  
999 shown.

1000

1001 **Figure 11: CD4<sup>+</sup> T cells with uropodia are effector cells co-expressing random**  
1002 **combinations of T cell subset transcription factors.**

1003 **A-F:** CTV labelled female MARKI CD4<sup>+</sup> T cells were stimulated as indicated with either  
1004 CD3/CD28 beads (**A, D**) or bmDC + 10nM Dby peptide (**B, C, E, F**), for 2 days with IL-2,  
1005 TGFβ and ATRA. Cultures were labelled “in situ” with CD4-APC-Cy7, live/dead aqua and  
1006 Mitotracker DR, fixed and permeabilised, and intracellularly for pS6-Alexa 488, GATA3-PE,  
1007 RORγt-PE-CF594, Foxp3-PE-Cy7, Tbet-BV605 and 7AAD. 50,000 images were acquired  
1008 per sample, and gated for live singlet cells in G<sub>0</sub>/G<sub>1</sub> with (**B, E:** area>10μm<sup>2</sup> in green) or  
1009 without (**C, F:** area<10μm<sup>2</sup> in red) uropodia, and, using CTV dilution, for cells that had not  
1010 yet divided (**A-C**) or had divided once or more (**D-F**). Dot plots show the intensity of nuclear  
1011 staining for RORγt versus GATA3, with co-expression of nuclear Foxp3 (yellow) or Tbet  
1012 (blue) also indicated. One of 5 similar experiments shown (2 with MARKI, 3 with A1RAG).

1013

1014 **Figure 12: CD4<sup>+</sup> T cells with uropodia are short-lived effector cells co-expressing**  
1015 **random combinations of T cell subset cytokines and granzyme B.**

1016 **A-F:** CTV labelled female A1RAG CD4<sup>+</sup> T cells were stimulated in the presence of IL-2,  
1017 TGFβ and ATRA with bmDC + 100nM Dby peptide for 3 days. Brefeldin was added to the  
1018 cultures for 2 hours before they were labelled “in situ” with CD4-APC-Cy7, live/dead aqua  
1019 and Mitotracker DR, fixed and permeabilised, and then intracellularly for IL2-FITC, IFNγ-  
1020 PE, IL4-PE-CF594, IL17-BV605, Foxp3-PE-Cy7 and 7AAD. Images were gated, as above,  
1021 for those with (**A:** red dots and **C-F:** red filled histograms) or without (**A:** blue dots and **C-F:**  
1022 blue histograms) uropodia. Median values of staining intensities for each cytokine are shown  
1023 in **C-F**, and example images in **B**. One of two similar experiments shown. **G-I:** CTV  
1024 labelled female A1RAG CD4<sup>+</sup> T cells were stimulated in the presence of IL-2, TGFβ and  
1025 ATRA with bmDC + 100nM Dby peptide for 3 days. Cultures were labelled “in situ” with  
1026 CD4-PE-CF594, CD3-APC-Cy7, CD62L-BV605, Mitotracker DR and live/dead aqua, fixed  
1027 and permeabilised, and intracellularly stained for γ-tubulin-Alexa488, granzyme B (GZMB-  
1028 PE) and foxp3-PE-Cy7. Example images are shown in **G**. The intensity of granzyme B  
1029 staining, with median values indicated (**H**) and the proportion of this staining falling within  
1030 uropodia (**I**), with median % indicated, for foxp3 negative cells either with (filled red) or  
1031 without (blue) uropodia, as well as for nuclear foxp3<sup>+</sup> cells (dashed yellow), are shown (one  
1032 of two similar experiments). **J-M:** CTV labelled female A1RAG CD4<sup>+</sup> T cells were  
1033 stimulated with bmDC + 100nM Dby plus IL2, TGFβ and ATRA for 7 days and labelled “in  
1034 situ” for Mitotracker DR and live/dead aqua, fixed and permeabilised, and stained for CD4-  
1035 PE-CF594 and 7AAD. In focus images were gated for singlet cells with a G<sub>0</sub>/G<sub>1</sub> DNA  
1036 content. Histograms show the absolute frequencies of live cells (live/dead aqua negative,  
1037 bright field contrast low: blue histograms) compared to dead/dying cells (apoptotic=bright  
1038 field contrast high plus necrotic=live/dead aqua positive: filled red) in each plot, comparing  
1039 cell divisions (**J**), uropodium area (**K**), Mitotracker DR staining (**L**) and CD4 (**M**), with  
1040 median values indicated. Representative data from many (>10) similar experiments is  
1041 shown.

1042

1043 **Figure 13: Nuclear NFκB is maintained in long-lived memory cells without uropodia**  
1044 **even when they reach quiescence and mTOR activation has ceased.**

1045 CTV labelled female A1RAG CD4<sup>+</sup> T cells were stimulated for 3 or 6 days in the presence of  
1046 IL-2, TGFβ and ATRA with bmDC + 100nM Dby peptide (3 days in yellow, 6 days green) or  
1047 CD3/CD28 beads (only day 6 shown in blue). “In situ” staining, fixation and image analysis  
1048 was a previously described, with histograms for CTV (A), pS6-Alexa488 (B) and pAKTS473  
1049 (C) shown. Data from one of many (>10) similar experiments shown. D-F: An identical  
1050 experiment to that above was set up, with DC+Ag stimulation analysed on day 3 (yellow) or  
1051 day 7 (green) and CD3/CD28 bead stimulation on day3 (blue). Histograms show CTV with  
1052 mean number of divisions indicated (D) and the intensities (with median values shown) of  
1053 total (E) or nuclear (F) NFκB (p65)-APC staining. One of two similar experiments.

1054

1055 **Figure 14: Long-lived memory CD4<sup>+</sup> T cells, without uropodia, have a lower threshold**  
1056 **for re-stimulation, when they make further, independent fate decisions to develop**  
1057 **uropodia or re-express CD62L.**

1058 A-C: CTV labelled female A1RAG CD4<sup>+</sup> T cells were stimulated with bmDC + 100nM Dby  
1059 for 3 days in the presence of IL2 (50U/ml) without TGFβ (A), IL2 (50U/ml) plus TGFβ  
1060 (2ng/ml) (B) or TGFβ plus anti-IL2 (clone S4B6, 50μg/ml) (C). Cells were “in situ” labelled  
1061 with live/dead aqua, fixed and permeabilised, then 7AAD. Histograms show the absolute  
1062 frequencies of CTV dilution, with grey dashed lines for all images (both live and dead), while  
1063 filled red (cells with uropodia >10mm<sup>2</sup>) and blue line (cells without uropodia) histograms are  
1064 gated for live cells only (live/dead aqua negative, bright field contrast low). Total numbers of  
1065 cells in each histogram are indicated. One of two similar experiments shown. D-F: CTV  
1066 labelled female MARKI CD4<sup>+</sup> T cells were stimulated with bmDC + 10nM Dby peptide with  
1067 IL2 (50U/ml) either with (E, F) or without (D) TGFβ (2ng/ml) for 10 days. Cells were “in  
1068 situ” labelled with live/dead aqua and Mitotracker DR (not shown), fixed and permeabilised,  
1069 then Tbet-Alexa488, foxp3-PE-Cy7, (GATA3-PE, RORγt-PE-CF594, CD4-APC-Cy7, all not  
1070 shown) and 7AAD. Histograms of absolute frequencies of CTV dilution for total live and  
1071 dead singlet cells (dashed grey), live cells with (filled red) and without (blue lines) uropodia,  
1072 together with total numbers of cells are shown (D, E). The intensities of Tbet and foxp3  
1073 staining within the nucleus of the live cells without uropodia are plotted in F. A similar result  
1074 was also observed using female A1RAG CD4<sup>+</sup> T cell 10 day cultures (not shown). G-I:  
1075 Female A1RAG CD4<sup>+</sup> T cells (not CTV labelled) were stimulated in the presence of IL-2,  
1076 TGFβ and ATRA with bmDC + 100nM Dby peptide (G, H) or CD3/CD28 beads (I) for 6  
1077 days. An aliquot of each sample was analysed as above for uropodia area, CD62L and  
1078 nuclear foxp3 expression (summarised in orange panels). Cells were harvested, ficoll-  
1079 hypaque separated, labelled with CTV and Mitotracker DR, then re-stimulated with either  
1080 CD3/CD28 beads (G) or bmDC+100nM Dby peptide (H, I) for 3 days. Cultures were  
1081 labelled “in situ” with CD4-PE-CF594, CD44-APC-eflour780, CD62L-BV605 and live/dead  
1082 aqua, fixed and permeabilised, and intracellularly stained for foxp3-PE-Cy7 (Mito-ID-Red,  
1083 pAKTS473-PE, not shown) and Sytox Green for DNA. Plots show the intensity of CD44 and  
1084 CD62L staining, with % in each quadrant indicated, after gating for live singlet cells with  
1085 G<sub>0</sub>/G<sub>1</sub> DNA content, and nfoxp3<sup>-</sup> cells with uropodia (area >10μm<sup>2</sup>: percentage and median  
1086 area shown in panel above) in red, without uropodia in blue, and nuclear foxp3<sup>+</sup> cells (% of  
1087 all cells shown in panel above) with or without uropodia shown in orange and yellow,  
1088 respectively. One of 3 similar experiments shown.

1089

1090 **Supplementary Video 1:** Live cell imaging of migrating, cell trace violet labelled CD4<sup>+</sup> T  
1091 cells (**A, B**) with mitochondria (Mitotracker DR stained) within uropodia at the rear.

1092

## 1093 **References**

- 1094 1. Kaech SM, Hemby S, Kersh E, Ahmed R. Molecular and functional profiling of  
1095 memory CD8 T cell differentiation. *Cell* (2002) 111(6):837-51. PubMed PMID: 12526810.
- 1096 2. Pearce EL, Shen H. Making sense of inflammation, epigenetics, and memory CD8<sup>+</sup>  
1097 T-cell differentiation in the context of infection. *Immunological reviews* (2006) 211:197-202.  
1098 doi: 10.1111/j.0105-2896.2006.00399.x. PubMed PMID: 16824128.
- 1099 3. O'Sullivan D, van der Windt GJ, Huang SC, Curtis JD, Chang CH, Buck MD, et al.  
1100 Memory CD8 T Cells Use Cell-Intrinsic Lipolysis to Support the Metabolic Programming  
1101 Necessary for Development. *Immunity* (2014). doi: 10.1016/j.immuni.2014.06.005. PubMed  
1102 PMID: 25001241.
- 1103 4. Dawicki W, Bertram EM, Sharpe AH, Watts TH. 4-1BB and OX40 act independently  
1104 to facilitate robust CD8 and CD4 recall responses. *J Immunol* (2004) 173(10):5944-51.  
1105 PubMed PMID: 15528328.
- 1106 5. Sabbagh L, Snell LM, Watts TH. TNF family ligands define niches for T cell  
1107 memory. *Trends in immunology* (2007) 28(8):333-9. doi: 10.1016/j.it.2007.06.001. PubMed  
1108 PMID: 17597006.
- 1109 6. Hawkins ED, Oliaro J, Kallies A, Belz GT, Filby A, Hogan T, et al. Regulation of  
1110 asymmetric cell division and polarity by Scribble is not required for humoral immunity.  
1111 *Nature communications* (2013) 4:1801. doi: 10.1038/ncomms2796. PubMed PMID:  
1112 23653213.
- 1113 7. Bannard O, Kraman M, Fearon D. Pathways of memory CD8<sup>+</sup> T-cell development.  
1114 *European journal of immunology* (2009) 39(8):2083-7. doi: 10.1002/eji.200939555. PubMed  
1115 PMID: 19637204.
- 1116 8. Chang JT, Ciocca ML, Kinjyo I, Palanivel VR, McClurkin CE, Dejong CS, et al.  
1117 Asymmetric proteasome segregation as a mechanism for unequal partitioning of the  
1118 transcription factor T-bet during T lymphocyte division. *Immunity* (2011) 34(4):492-504. doi:  
1119 10.1016/j.immuni.2011.03.017. PubMed PMID: 21497118; PubMed Central PMCID:  
1120 PMC3088519.
- 1121 9. Chang JT, Palanivel VR, Kinjyo I, Schambach F, Intlekofer AM, Banerjee A, et al.  
1122 Asymmetric T lymphocyte division in the initiation of adaptive immune responses. *Science*  
1123 (2007) 315(5819):1687-91. Epub 2007/03/03. doi: 1139393 [pii]  
1124 10.1126/science.1139393. PubMed PMID: 17332376.
- 1125 10. Oliaro J, Van Ham V, Sacirbegovic F, Pasam A, Bomzon Z, Pham K, et al.  
1126 Asymmetric cell division of T cells upon antigen presentation uses multiple conserved  
1127 mechanisms. *J Immunol* (2010) 185(1):367-75. Epub 2010/06/10. doi: jimmunol.0903627  
1128 [pii]  
1129 10.4049/jimmunol.0903627. PubMed PMID: 20530266.
- 1130 11. Nish SA, Zens KD, Kratchmarov R, Lin WW, Adams WC, Chen YH, et al. CD4<sup>+</sup> T  
1131 cell effector commitment coupled to self-renewal by asymmetric cell divisions. *The Journal*  
1132 *of experimental medicine* (2017) 214(1):39-47. doi: 10.1084/jem.20161046. PubMed PMID:  
1133 27923906; PubMed Central PMCID: PMC5206501.
- 1134 12. Lin WH, Adams WC, Nish SA, Chen YH, Yen B, Rothman NJ, et al. Asymmetric  
1135 PI3K Signaling Driving Developmental and Regenerative Cell Fate Bifurcation. *Cell reports*

- 1136 (2015) 13(10):2203-18. doi: 10.1016/j.celrep.2015.10.072. PubMed PMID: 26628372;  
1137 PubMed Central PMCID: PMC4685001.
- 1138 13. Pollizzi KN, Sun IH, Patel CH, Lo YC, Oh MH, Waickman AT, et al. Asymmetric  
1139 inheritance of mTORC1 kinase activity during division dictates CD8(+) T cell differentiation.  
1140 *Nature immunology* (2016) 17(6):704-11. doi: 10.1038/ni.3438. PubMed PMID: 27064374;  
1141 PubMed Central PMCID: PMC4873361.
- 1142 14. Verbist KC, Guy CS, Milasta S, Liedmann S, Kaminski MM, Wang R, et al.  
1143 Metabolic maintenance of cell asymmetry following division in activated T lymphocytes.  
1144 *Nature* (2016) 532(7599):389-93. doi: 10.1038/nature17442. PubMed PMID: 27064903;  
1145 PubMed Central PMCID: PMC4851250.
- 1146 15. Gubser PM, Bantug GR, Razik L, Fischer M, Dimeloe S, Hoenger G, et al. Rapid  
1147 effector function of memory CD8<sup>+</sup> T cells requires an immediate-early glycolytic switch.  
1148 *Nature immunology* (2013) 14(10):1064-72. doi: 10.1038/ni.2687. PubMed PMID:  
1149 23955661.
- 1150 16. Jung HR, Song KH, Chang JT, Doh J. Geometrically controlled asymmetric division  
1151 of CD4<sup>+</sup> T cells studied by immunological synapse arrays. *PloS one* (2014) 9(3):e91926. doi:  
1152 10.1371/journal.pone.0091926. PubMed PMID: 24632942; PubMed Central PMCID:  
1153 PMC3954838.
- 1154 17. Zheng Y, Josefowicz S, Chaudhry A, Peng XP, Forbush K, Rudensky AY. Role of  
1155 conserved non-coding DNA elements in the *Foxp3* gene in regulatory T-cell fate. *Nature*  
1156 (2010) 463(7282):808-12. doi: 10.1038/nature08750. PubMed PMID: 20072126; PubMed  
1157 Central PMCID: PMC2884187.
- 1158 18. Rosenblum MD, Way SS, Abbas AK. Regulatory T cell memory. *Nature reviews*  
1159 *Immunology* (2016) 16(2):90-101. doi: 10.1038/nri.2015.1. PubMed PMID: 26688349;  
1160 PubMed Central PMCID: PMC5113825.
- 1161 19. Ohkura N, Hamaguchi M, Morikawa H, Sugimura K, Tanaka A, Ito Y, et al. T cell  
1162 receptor stimulation-induced epigenetic changes and *Foxp3* expression are independent and  
1163 complementary events required for Treg cell development. *Immunity* (2012) 37(5):785-99.  
1164 doi: 10.1016/j.immuni.2012.09.010. PubMed PMID: 23123060.
- 1165 20. Liston A, Rudensky AY. Thymic development and peripheral homeostasis of  
1166 regulatory T cells. *Current opinion in immunology* (2007) 19(2):176-85. doi:  
1167 10.1016/j.coi.2007.02.005. PubMed PMID: 17306520.
- 1168 21. Kendal AR, Chen Y, Regateiro FS, Ma J, Adams E, Cobbold SP, et al. Sustained  
1169 suppression by *Foxp3*<sup>+</sup> regulatory T cells is vital for infectious transplantation tolerance. *The*  
1170 *Journal of experimental medicine* (2011) 208(10):2043-53. Epub 2011/08/31. doi:  
1171 10.1084/jem.20110767. PubMed PMID: 21875958; PubMed Central PMCID: PMC3182049.
- 1172 22. Cobbold SP, Qin S, Leong LY, Martin G, Waldmann H. Reprogramming the immune  
1173 system for peripheral tolerance with CD4 and CD8 monoclonal antibodies. *Immunological*  
1174 *reviews* (1992) 129:165-201. PubMed PMID: 1464419.
- 1175 23. Howie D, Cobbold SP, Adams E, Ten Bokum A, Necula AS, Zhang W, et al. *Foxp3*  
1176 drives oxidative phosphorylation and protection from lipotoxicity. *JCI insight* (2017)  
1177 2(3):e89160. doi: 10.1172/jci.insight.89160. PubMed PMID: 28194435; PubMed Central  
1178 PMCID: PMC5291728.
- 1179 24. Pearce EL, Poffenberger MC, Chang CH, Jones RG. Fueling immunity: insights into  
1180 metabolism and lymphocyte function. *Science* (2013) 342(6155):1242454. doi:  
1181 10.1126/science.1242454. PubMed PMID: 24115444.
- 1182 25. Gabrysova L, Nicolson KS, Streeter HB, Verhagen J, Sabatos-Peyton CA, Morgan  
1183 DJ, et al. Negative feedback control of the autoimmune response through antigen-induced  
1184 differentiation of IL-10-secreting Th1 cells. *The Journal of experimental medicine* (2009)



- 1185 206(8):1755-67. doi: 10.1084/jem.20082118. PubMed PMID: 19635862; PubMed Central  
1186 PMCID: PMC2722173.
- 1187 26. McGrath KE, Bushnell TP, Palis J. Multispectral imaging of hematopoietic cells:  
1188 where flow meets morphology. *Journal of immunological methods* (2008) 336(2):91-7. doi:  
1189 10.1016/j.jim.2008.04.012. PubMed PMID: 18539294; PubMed Central PMCID:  
1190 PMC2529019.
- 1191 27. McFarland W, Heilman DH. Lymphocyte Foot Appendage: Its Role in Lymphocyte  
1192 Function and in Immunological Reactions. *Nature* (1965) 205:887-8. PubMed PMID:  
1193 14293154.
- 1194 28. Fais S, Malorni W. Leukocyte uropod formation and membrane/cytoskeleton linkage  
1195 in immune interactions. *Journal of leukocyte biology* (2003) 73(5):556-63. PubMed PMID:  
1196 12714569.
- 1197 29. Morlino G, Barreiro O, Baixauli F, Robles-Valero J, Gonzalez-Granado JM, Villa-  
1198 Bellosta R, et al. Miro-1 links mitochondria and microtubule Dynein motors to control  
1199 lymphocyte migration and polarity. *Molecular and cellular biology* (2014) 34(8):1412-26.  
1200 doi: 10.1128/MCB.01177-13. PubMed PMID: 24492963; PubMed Central PMCID:  
1201 PMC3993592.
- 1202 30. Cobbold SP, Adams E, Farquhar CA, Nolan KF, Howie D, Lui KO, et al. Infectious  
1203 tolerance via the consumption of essential amino acids and mTOR signaling. *Proceedings of*  
1204 *the National Academy of Sciences of the United States of America* (2009) 106(29):12055-60.  
1205 doi: 10.1073/pnas.0903919106. PubMed PMID: 19567830; PubMed Central PMCID:  
1206 PMC2704109.
- 1207 31. Cobbold SP, Castejon R, Adams E, Zelenika D, Graca L, Humm S, et al. Induction of  
1208 foxP3<sup>+</sup> regulatory T cells in the periphery of T cell receptor transgenic mice tolerized to  
1209 transplants. *J Immunol* (2004) 172(10):6003-10. Epub 2004/05/07. PubMed PMID:  
1210 15128783.
- 1211 32. Nolan KF, Strong V, Soler D, Fairchild PJ, Cobbold SP, Croxton R, et al. IL-10-  
1212 conditioned dendritic cells, decommissioned for recruitment of adaptive immunity, elicit  
1213 innate inflammatory gene products in response to danger signals. *J Immunol* (2004)  
1214 172(4):2201-9. Epub 2004/02/07. PubMed PMID: 14764687.
- 1215 33. Inaba K, Inaba M, Romani N, Aya H, Deguchi M, Ikehara S, et al. Generation of  
1216 large numbers of dendritic cells from mouse bone marrow cultures supplemented with  
1217 granulocyte/macrophage colony-stimulating factor. *The Journal of experimental medicine*  
1218 (1992) 176(6):1693-702. PubMed PMID: 1460426; PubMed Central PMCID: PMC2119469.
- 1219 34. Wuthrich RP. Monoclonal antibodies targeting murine LFA-1 induce LFA-1/ICAM-  
1220 1-independent homotypic lymphocyte aggregation. *Cellular immunology* (1992) 144(1):22-  
1221 31. PubMed PMID: 1356633.
- 1222 35. Tone M, Tone Y, Adams E, Yates SF, Frewin MR, Cobbold SP, et al. Mouse  
1223 glucocorticoid-induced tumor necrosis factor receptor ligand is costimulatory for T cells.  
1224 *Proceedings of the National Academy of Sciences of the United States of America* (2003)  
1225 100(25):15059-64. doi: 10.1073/pnas.2334901100. PubMed PMID: 14608036; PubMed  
1226 Central PMCID: PMC299905.
- 1227 36. Howie D, Nolan KF, Daley S, Butterfield E, Adams E, Garcia-Rueda H, et al.  
1228 MS4A4B is a GITR-associated membrane adapter, expressed by regulatory T cells, which  
1229 modulates T cell activation. *J Immunol* (2009) 183(7):4197-204. doi:  
1230 10.4049/jimmunol.0901070. PubMed PMID: 19752228.
- 1231 37. Filby A, Perucha E, Summers H, Rees P, Chana P, Heck S, et al. An imaging flow  
1232 cytometric method for measuring cell division history and molecular symmetry during  
1233 mitosis. *Cytometry Part A : the journal of the International Society for Analytical Cytology*

- 1234 (2011) 79(7):496-506. Epub 2011/06/04. doi: 10.1002/cyto.a.21091. PubMed PMID:  
1235 21638766.
- 1236 38. Adams WC, Chen YH, Kratchmarov R, Yen B, Nish SA, Lin WW, et al. Anabolism-  
1237 Associated Mitochondrial Stasis Driving Lymphocyte Differentiation over Self-Renewal.  
1238 *Cell reports* (2016) 17(12):3142-52. doi: 10.1016/j.celrep.2016.11.065. PubMed PMID:  
1239 28009285; PubMed Central PMCID: PMC5189677.
- 1240 39. Delisle JS, Giroux M, Boucher G, Landry JR, Hardy MP, Lemieux S, et al. The TGF-  
1241 beta-Smad3 pathway inhibits CD28-dependent cell growth and proliferation of CD4 T cells.  
1242 *Genes and immunity* (2013) 14(2):115-26. doi: 10.1038/gene.2012.63. PubMed PMID:  
1243 23328844.
- 1244 40. Cobbold SP, Adams E, Waldmann H. Biomarkers of transplantation tolerance: more  
1245 hopeful than helpful? *Frontiers in immunology* (2011) 2:9. doi: 10.3389/fimmu.2011.00009.  
1246 PubMed PMID: 22566800; PubMed Central PMCID: PMC3342063.
- 1247 41. Riffelmacher T, Richter FC, Simon AK. Autophagy dictates metabolism and  
1248 differentiation of inflammatory immune cells. *Autophagy* (2017):1-8. doi:  
1249 10.1080/15548627.2017.1362525. PubMed PMID: 28806133.
- 1250 42. Buchholz VR, Flossdorf M, Hensel I, Kretschmer L, Weissbrich B, Graf P, et al.  
1251 Disparate individual fates compose robust CD8<sup>+</sup> T cell immunity. *Science* (2013)  
1252 340(6132):630-5. doi: 10.1126/science.1235454. PubMed PMID: 23493420.
- 1253 43. Buck MD, O'Sullivan D, Klein Geltink RI, Curtis JD, Chang CH, Sanin DE, et al.  
1254 Mitochondrial Dynamics Controls T Cell Fate through Metabolic Programming. *Cell* (2016)  
1255 166(1):63-76. doi: 10.1016/j.cell.2016.05.035. PubMed PMID: 27293185; PubMed Central  
1256 PMCID: PMC4974356.
- 1257 44. Sanchez-Madrid F, Serrador JM. Bringing up the rear: defining the roles of the  
1258 uropod. *Nature reviews Molecular cell biology* (2009) 10(5):353-9. doi: 10.1038/nrm2680.  
1259 PubMed PMID: 19373240.
- 1260 45. Riaz A, Zeller KS, Johansson S. Receptor-specific mechanisms regulate  
1261 phosphorylation of AKT at Ser473: role of RICTOR in beta1 integrin-mediated cell survival.  
1262 *PloS one* (2012) 7(2):e32081. doi: 10.1371/journal.pone.0032081. PubMed PMID:  
1263 22384145; PubMed Central PMCID: PMC3284553.
- 1264 46. Wang B, Jie Z, Joo D, Ordureau A, Liu P, Gan W, et al. TRAF2 and OTUD7B govern  
1265 a ubiquitin-dependent switch that regulates mTORC2 signalling. *Nature* (2017)  
1266 545(7654):365-9. doi: 10.1038/nature22344. PubMed PMID: 28489822.
- 1267 47. Andrecut M, Halley JD, Winkler DA, Huang S. A general model for binary cell fate  
1268 decision gene circuits with degeneracy: indeterminacy and switch behavior in the absence of  
1269 cooperativity. *PloS one* (2011) 6(5):e19358. doi: 10.1371/journal.pone.0019358. PubMed  
1270 PMID: 21625586; PubMed Central PMCID: PMC3098230.
- 1271 48. Hresko RC, Mueckler M. mTOR.RICTOR is the Ser473 kinase for Akt/protein kinase  
1272 B in 3T3-L1 adipocytes. *The Journal of biological chemistry* (2005) 280(49):40406-16. doi:  
1273 10.1074/jbc.M508361200. PubMed PMID: 16221682.
- 1274 49. Knudson KM, Pritzl CJ, Saxena V, Altman A, Daniels MA, Teixeira E. NFkappaB-  
1275 Pim-1-Eomesodermin axis is critical for maintaining CD8 T-cell memory quality.  
1276 *Proceedings of the National Academy of Sciences of the United States of America* (2017)  
1277 114(9):E1659-E67. doi: 10.1073/pnas.1608448114. PubMed PMID: 28193872; PubMed  
1278 Central PMCID: PMC5338529.
- 1279 50. Miao Y, Bhushan J, Dani A, Vig M. Na<sup>+</sup> influx via Orai1 inhibits intracellular ATP-  
1280 induced mTORC2 signaling to disrupt CD4 T cell gene expression and differentiation. *eLife*  
1281 (2017) 6. doi: 10.7554/eLife.25155. PubMed PMID: 28492364; PubMed Central PMCID:  
1282 PMC5459575.

- 1283 51. Suvas S, Kim B, Sarangi PP, Tone M, Waldmann H, Rouse BT. In vivo kinetics of  
1284 GITR and GITR ligand expression and their functional significance in regulating viral  
1285 immunopathology. *Journal of virology* (2005) 79(18):11935-42. doi:  
1286 10.1128/JVI.79.18.11935-11942.2005. PubMed PMID: 16140769; PubMed Central PMCID:  
1287 PMC1212625.
- 1288 52. Salek-Ardakani S, Flynn R, Arens R, Yagita H, Smith GL, Borst J, et al. The TNFR  
1289 family members OX40 and CD27 link viral virulence to protective T cell vaccines in mice. *J*  
1290 *Clin Invest* (2011) 121(1):296-307. doi: 10.1172/JCI42056. PubMed PMID: 21183789;  
1291 PubMed Central PMCID: PMC3007137.
- 1292 53. Russell SM. Determination of T-cell fate by dendritic cells: a new role for asymmetric  
1293 cell division? *Immunol Cell Biol* (2008) 86(5):423-7. Epub 2008/04/09. doi: icb200824 [pii]  
1294 10.1038/icb.2008.24. PubMed PMID: 18392041.
- 1295 54. Liston A, Gray DH. Homeostatic control of regulatory T cell diversity. *Nature*  
1296 *reviews Immunology* (2014) 14(3):154-65. doi: 10.1038/nri3605. PubMed PMID: 24481337.
- 1297 55. Sharma V, Delgado M, Ganea D. Granzyme B, a new player in activation-induced  
1298 cell death, is down-regulated by vasoactive intestinal peptide in Th2 but not Th1 effectors. *J*  
1299 *Immunol* (2006) 176(1):97-110. PubMed PMID: 16365400.
- 1300 56. Manes TD, Pober JS. Polarized granzyme release is required for antigen-driven  
1301 transendothelial migration of human effector memory CD4 T cells. *J Immunol* (2014)  
1302 193(12):5809-15. doi: 10.4049/jimmunol.1401665. PubMed PMID: 25367116; PubMed  
1303 Central PMCID: PMC4258477.
- 1304 57. Ren H, Ferguson BJ, Maluquer de Motes C, Sumner RP, Harman LE, Smith GL.  
1305 Enhancement of CD8(+) T-cell memory by removal of a vaccinia virus nuclear factor-  
1306 kappaB inhibitor. *Immunology* (2015) 145(1):34-49. doi: 10.1111/imm.12422. PubMed  
1307 PMID: 25382035; PubMed Central PMCID: PMC4405322.
- 1308 58. Guan T, Dominguez CX, Amezcua RA, Laidlaw BJ, Cheng J, Henao-Mejia J, et al.  
1309 ZEB1, ZEB2, and the miR-200 family form a counterregulatory network to regulate CD8(+)  
1310 T cell fates. *The Journal of experimental medicine* (2018). doi: 10.1084/jem.20171352.  
1311 PubMed PMID: 29449309.
- 1312 59. van der Windt GJ, Everts B, Chang CH, Curtis JD, Freitas TC, Amiel E, et al.  
1313 Mitochondrial respiratory capacity is a critical regulator of CD8+ T cell memory  
1314 development. *Immunity* (2012) 36(1):68-78. doi: 10.1016/j.immuni.2011.12.007. PubMed  
1315 PMID: 22206904; PubMed Central PMCID: PMC3269311.
- 1316 60. Akondy RS, Fitch M, Edupuganti S, Yang S, Kissick HT, Li KW, et al. Origin and  
1317 differentiation of human memory CD8 T cells after vaccination. *Nature* (2017)  
1318 552(7685):362-7. doi: 10.1038/nature24633. PubMed PMID: 29236685.
- 1319 61. Youngblood B, Hale JS, Kissick HT, Ahn E, Xu X, Wieland A, et al. Effector CD8 T  
1320 cells dedifferentiate into long-lived memory cells. *Nature* (2017) 552(7685):404-9. doi:  
1321 10.1038/nature25144. PubMed PMID: 29236683.
- 1322 62. Negulescu PA, Krasieva TB, Khan A, Kerschbaum HH, Cahalan MD. Polarity of T  
1323 cell shape, motility, and sensitivity to antigen. *Immunity* (1996) 4(5):421-30. PubMed PMID:  
1324 8630728.
- 1325 63. Aguado R, Martin-Blanco N, Caraballo M, Canelles M. The endocytic adaptor Numb  
1326 regulates thymus size by modulating pre-TCR signaling during asymmetric division. *Blood*  
1327 (2010) 116(10):1705-14. Epub 2010/06/10. doi: blood-2009-10-246777 [pii]  
1328 10.1182/blood-2009-10-246777. PubMed PMID: 20530794.
- 1329 64. Couturier L, Vodovar N, Schweisguth F. Endocytosis by Numb breaks Notch  
1330 symmetry at cytokinesis. *Nat Cell Biol* (2012) 14(2):131-9. Epub 2012/01/24. doi: ncb2419  
1331 [pii]

- 1332 10.1038/ncb2419. PubMed PMID: 22267085.
- 1333 65. Zeng H, Yang K, Cloer C, Neale G, Vogel P, Chi H. mTORC1 couples immune  
1334 signals and metabolic programming to establish T(reg)-cell function. *Nature* (2013)  
1335 499(7459):485-90. doi: 10.1038/nature12297. PubMed PMID: 23812589; PubMed Central  
1336 PMCID: PMC3759242.
- 1337 66. Delgoffe GM, Pollizzi KN, Waickman AT, Heikamp E, Meyers DJ, Horton MR, et al.  
1338 The kinase mTOR regulates the differentiation of helper T cells through the selective  
1339 activation of signaling by mTORC1 and mTORC2. *Nature immunology* (2011) 12(4):295-  
1340 303. doi: 10.1038/ni.2005. PubMed PMID: 21358638; PubMed Central PMCID:  
1341 PMC3077821.
- 1342 67. Lee K, Gudapati P, Dragovic S, Spencer C, Joyce S, Killeen N, et al. Mammalian  
1343 target of rapamycin protein complex 2 regulates differentiation of Th1 and Th2 cell subsets  
1344 via distinct signaling pathways. *Immunity* (2010) 32(6):743-53. doi:  
1345 10.1016/j.immuni.2010.06.002. PubMed PMID: 20620941; PubMed Central PMCID:  
1346 PMC2911434.
- 1347 68. Delgoffe GM, Kole TP, Zheng Y, Zarek PE, Matthews KL, Xiao B, et al. The mTOR  
1348 kinase differentially regulates effector and regulatory T cell lineage commitment. *Immunity*  
1349 (2009) 30(6):832-44. doi: 10.1016/j.immuni.2009.04.014. PubMed PMID: 19538929;  
1350 PubMed Central PMCID: PMC2768135.
- 1351 69. Sauer S, Bruno L, Hertweck A, Finlay D, Leleu M, Spivakov M, et al. T cell receptor  
1352 signaling controls Foxp3 expression via PI3K, Akt, and mTOR. *Proceedings of the National*  
1353 *Academy of Sciences of the United States of America* (2008) 105(22):7797-802. doi:  
1354 10.1073/pnas.0800928105. PubMed PMID: 18509048; PubMed Central PMCID:  
1355 PMC2409380.
- 1356 70. Haxhinasto S, Mathis D, Benoist C. The AKT-mTOR axis regulates de novo  
1357 differentiation of CD4<sup>+</sup>Foxp3<sup>+</sup> cells. *The Journal of experimental medicine* (2008)  
1358 205(3):565-74. doi: 10.1084/jem.20071477. PubMed PMID: 18283119; PubMed Central  
1359 PMCID: PMC2275380.
- 1360 71. Graef P, Buchholz VR, Stemberger C, Flossdorf M, Henkel L, Schiemann M, et al.  
1361 Serial transfer of single-cell-derived immunocompetence reveals stemness of CD8(+) central  
1362 memory T cells. *Immunity* (2014) 41(1):116-26. doi: 10.1016/j.immuni.2014.05.018. PubMed  
1363 PMID: 25035956.
- 1364 72. van der Windt GJ, Pearce EL. Metabolic switching and fuel choice during T-cell  
1365 differentiation and memory development. *Immunological reviews* (2012) 249(1):27-42. doi:  
1366 10.1111/j.1600-065X.2012.01150.x. PubMed PMID: 22889213; PubMed Central PMCID:  
1367 PMC3645891.
- 1368 73. Michalek RD, Gerriets VA, Jacobs SR, Macintyre AN, MacIver NJ, Mason EF, et al.  
1369 Cutting edge: distinct glycolytic and lipid oxidative metabolic programs are essential for  
1370 effector and regulatory CD4<sup>+</sup> T cell subsets. *J Immunol* (2011) 186(6):3299-303. doi:  
1371 10.4049/jimmunol.1003613. PubMed PMID: 21317389; PubMed Central PMCID:  
1372 PMC3198034.
- 1373 74. Cobbold SP. The mTOR pathway and integrating immune regulation. *Immunology*  
1374 (2013) 140(4):391-8. doi: 10.1111/imm.12162. PubMed PMID: 23952610; PubMed Central  
1375 PMCID: PMC3839643.
- 1376 75. Howie D, Waldmann H, Cobbold S. Nutrient Sensing via mTOR in T Cells Maintains  
1377 a Tolerogenic Microenvironment. *Frontiers in immunology* (2014) 5:409. doi:  
1378 10.3389/fimmu.2014.00409. PubMed PMID: 25221554; PubMed Central PMCID:  
1379 PMC4147234.
- 1380



## Figure 1

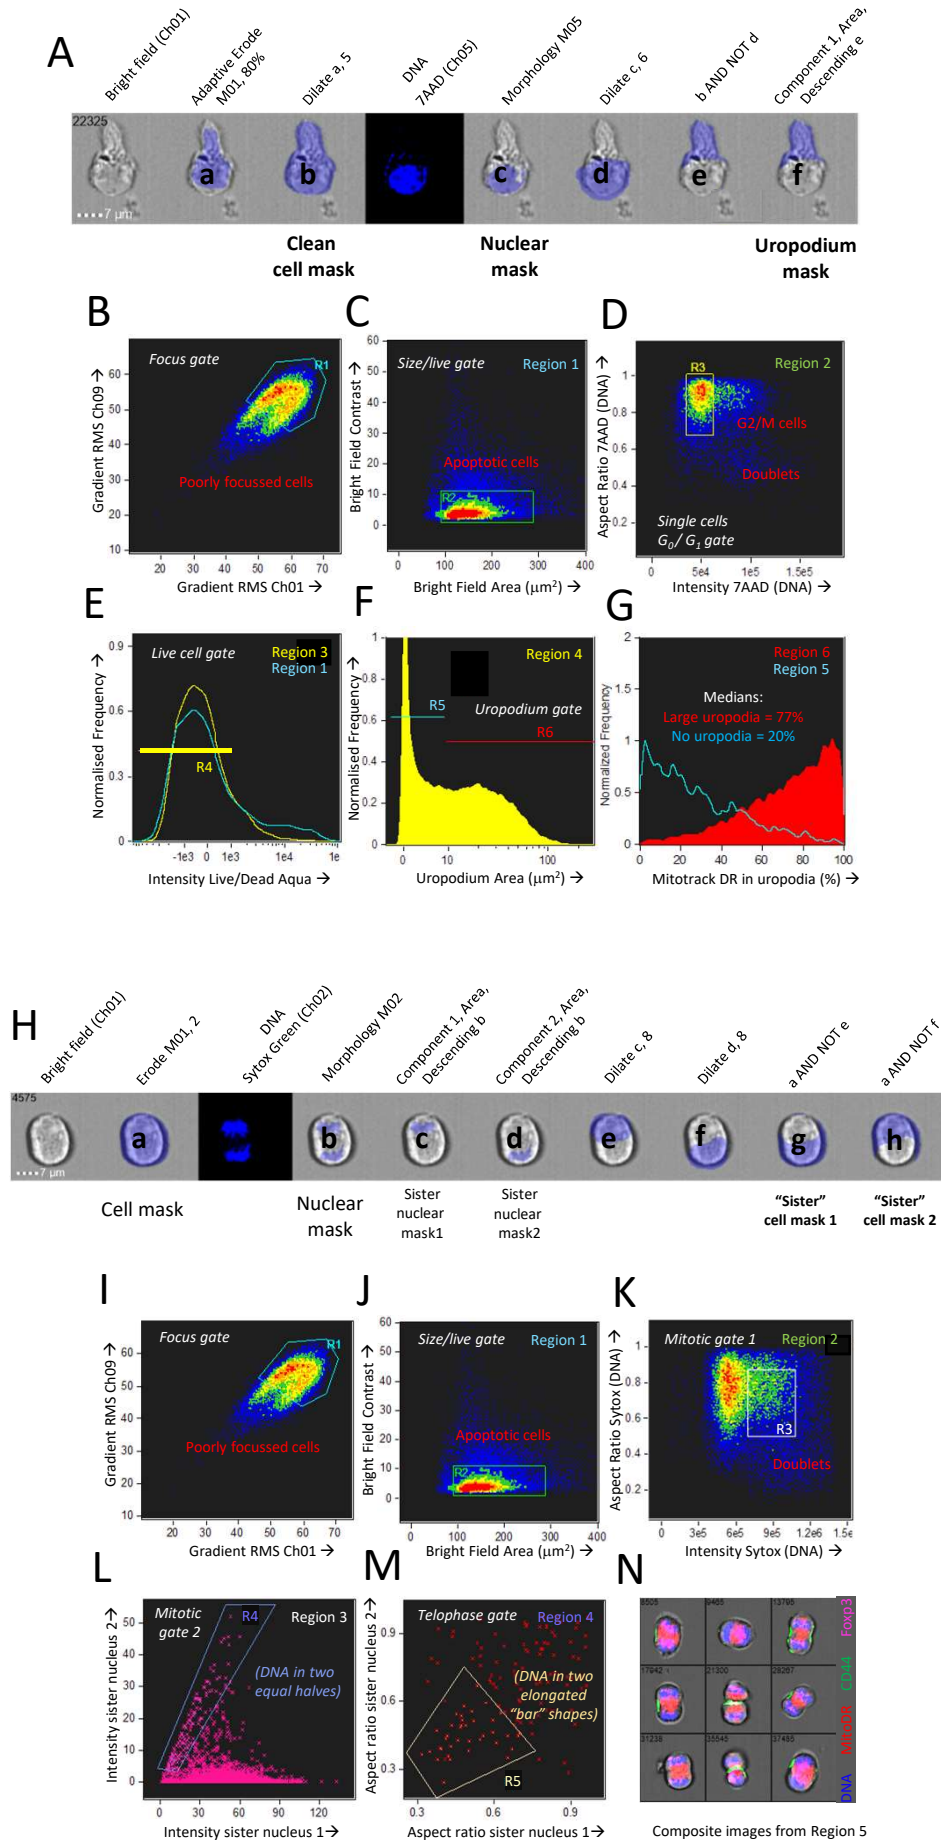

## Figure 2

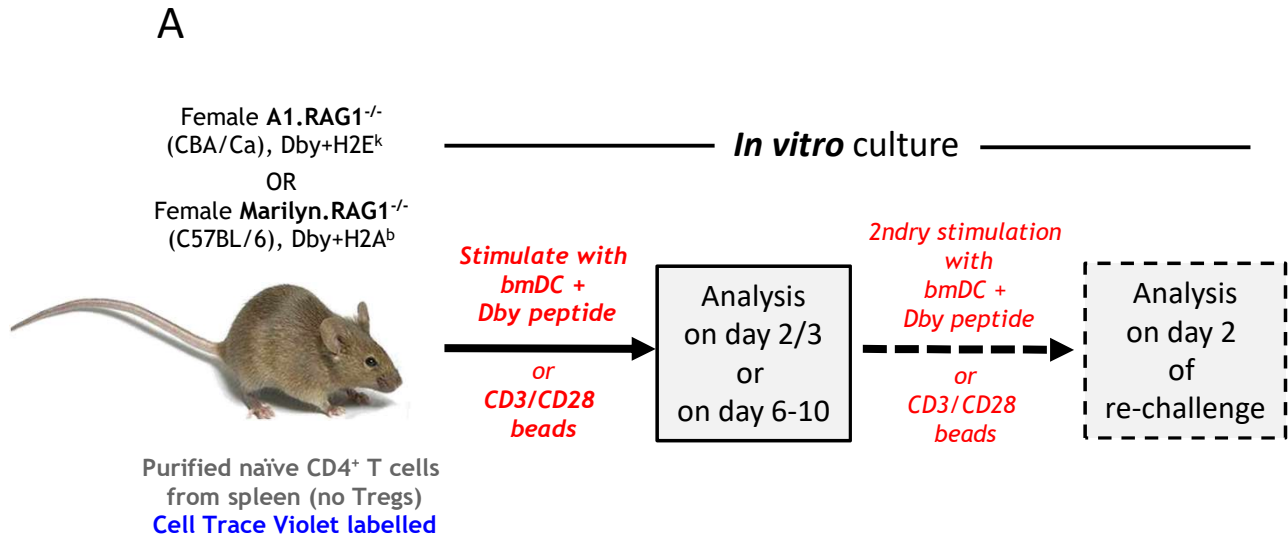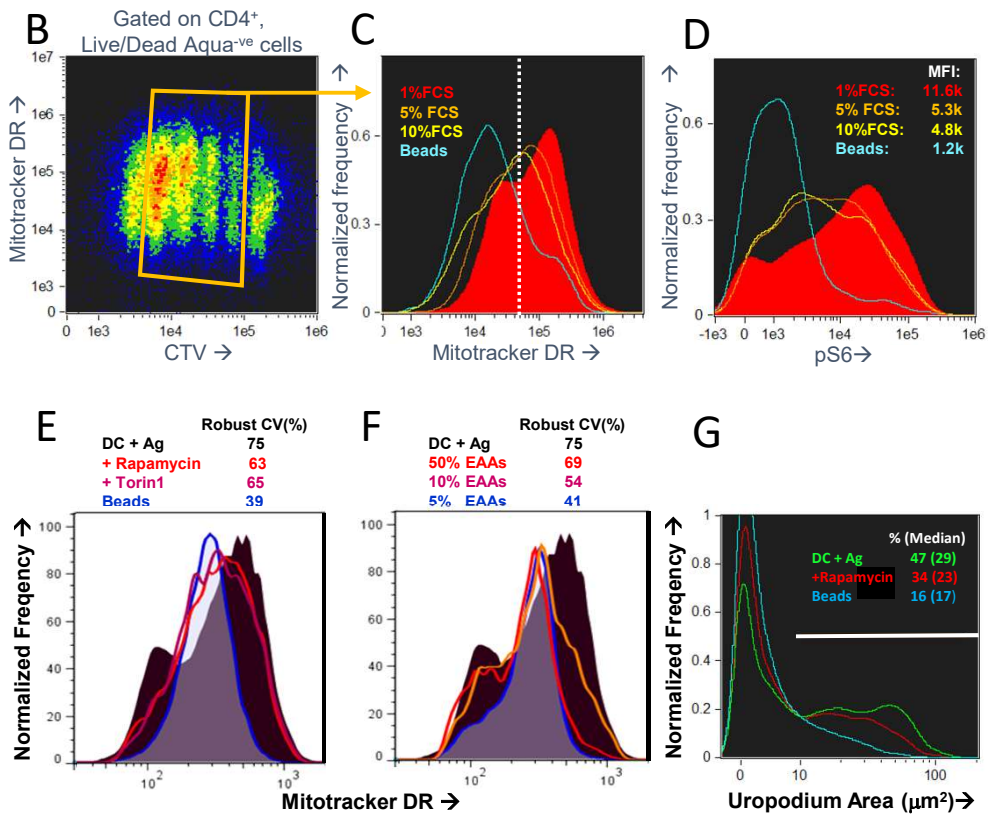

## Figure 3

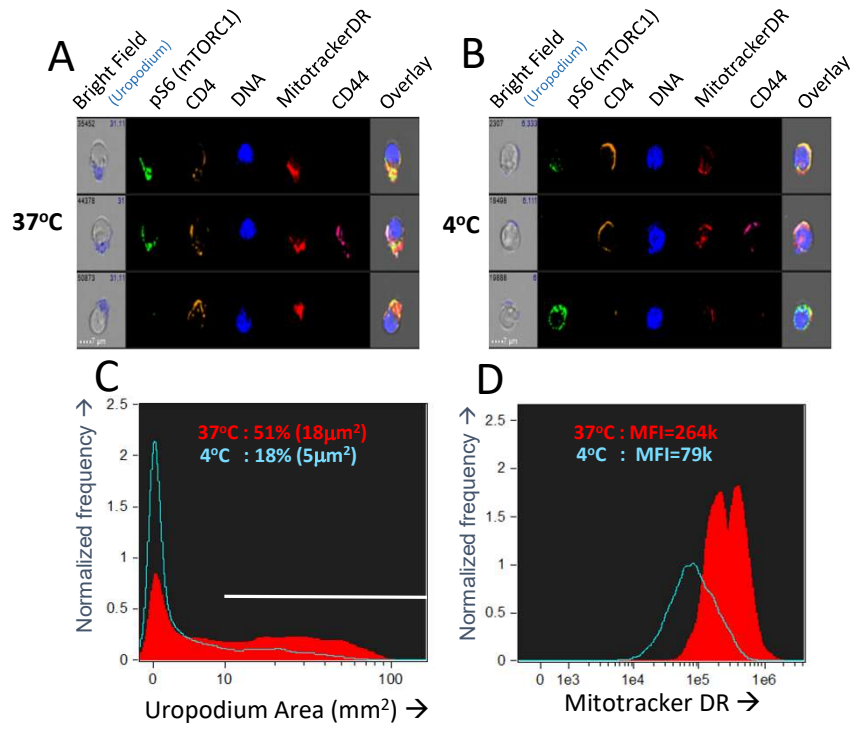

## Figure 4

A

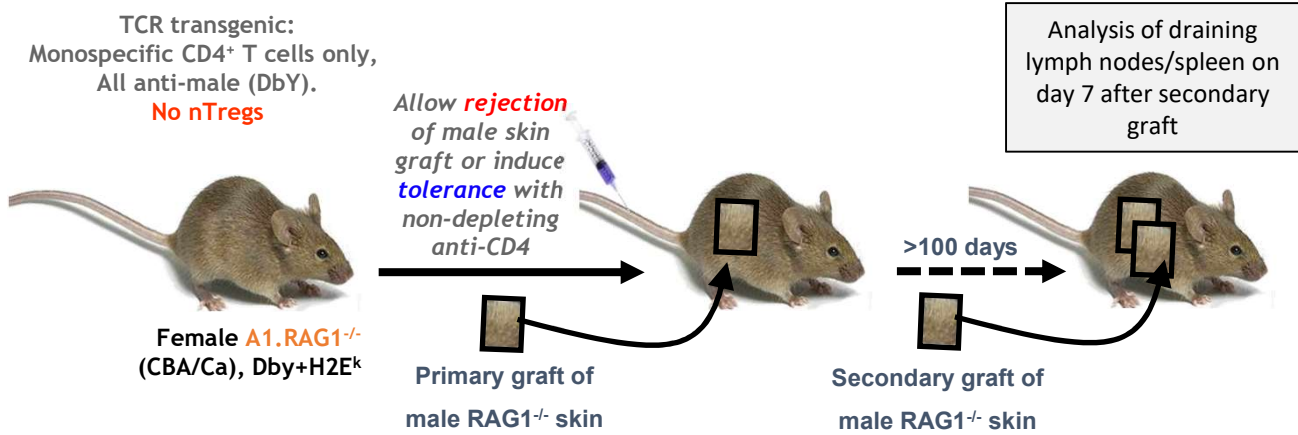

B

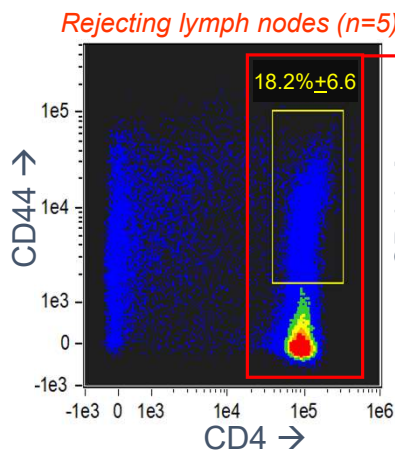

C

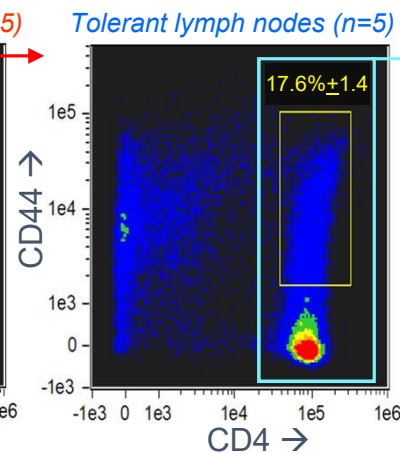

D

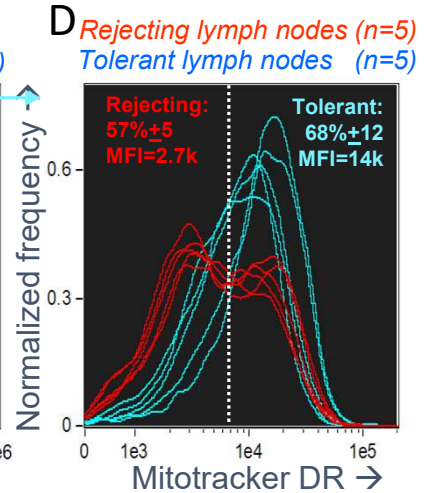



## Figure 5

A

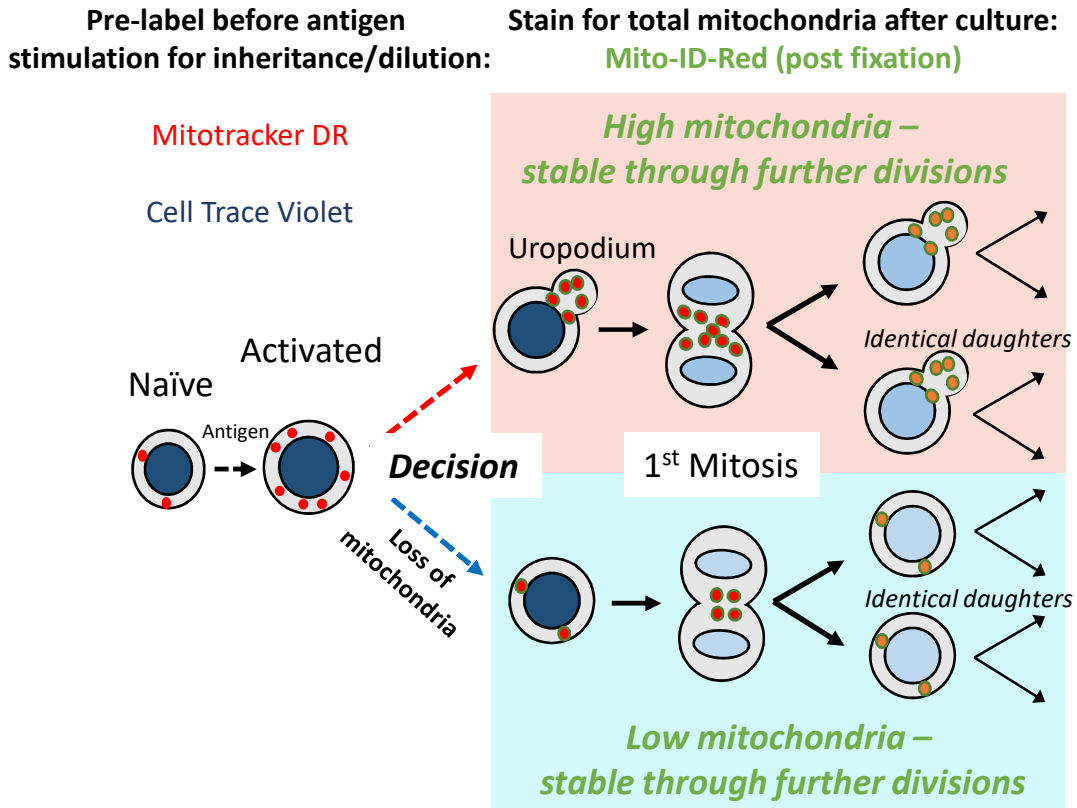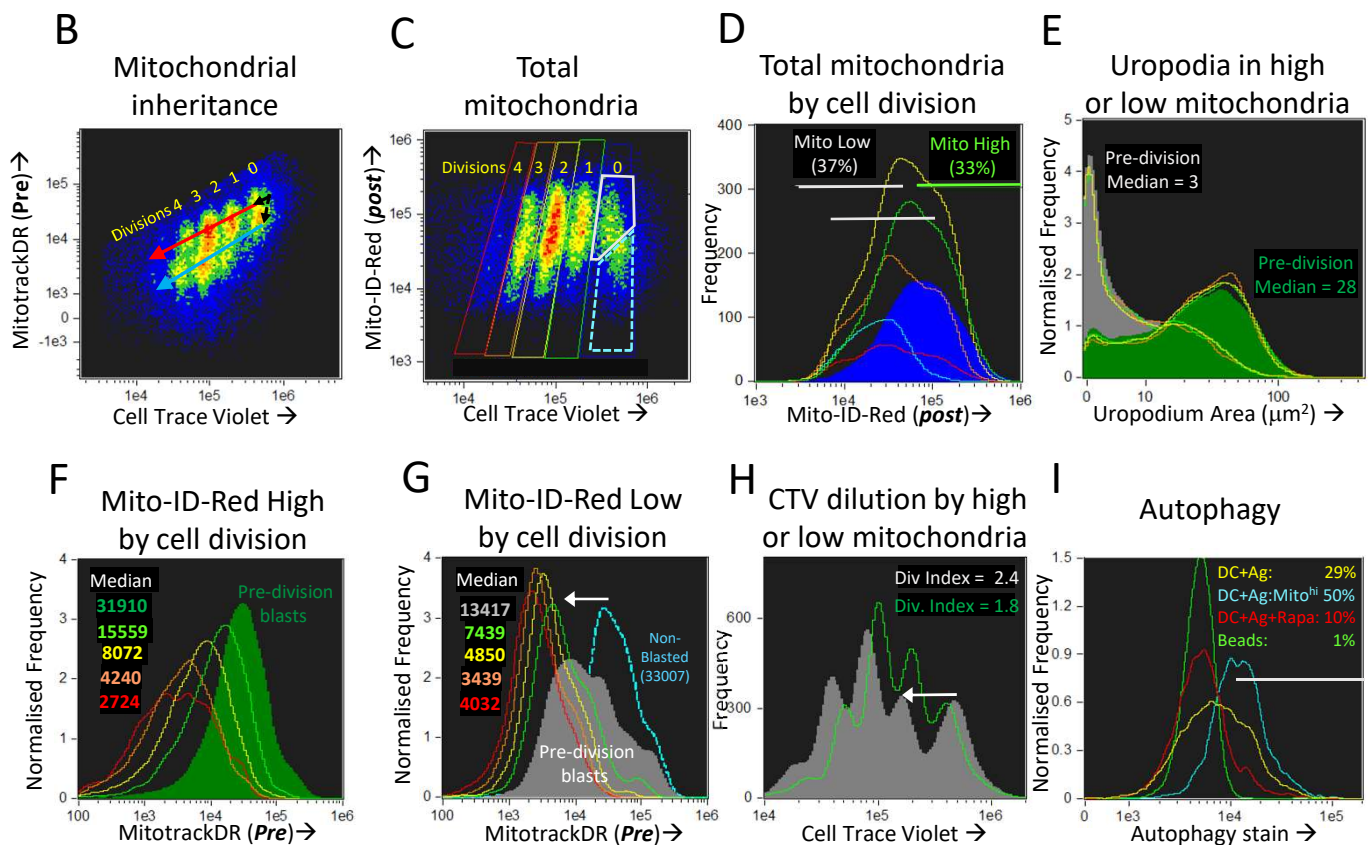

## Figure 6

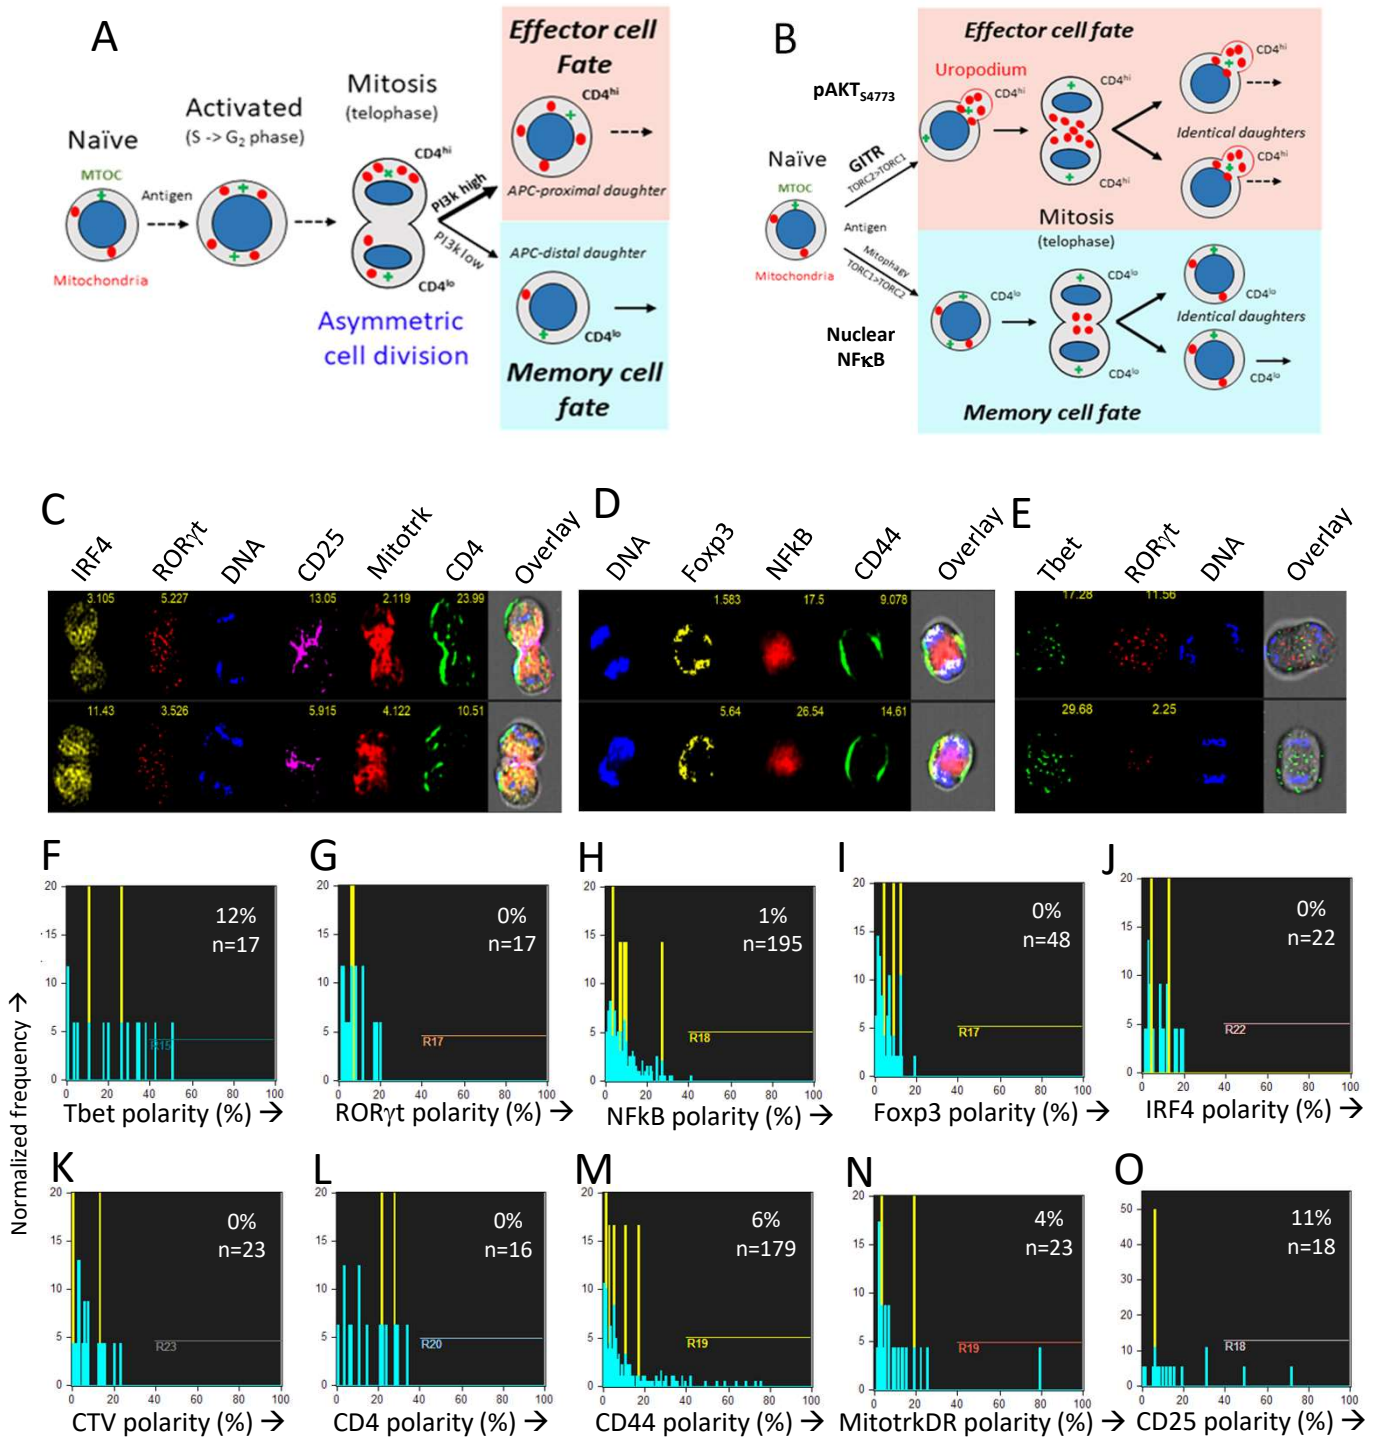

Figure 7

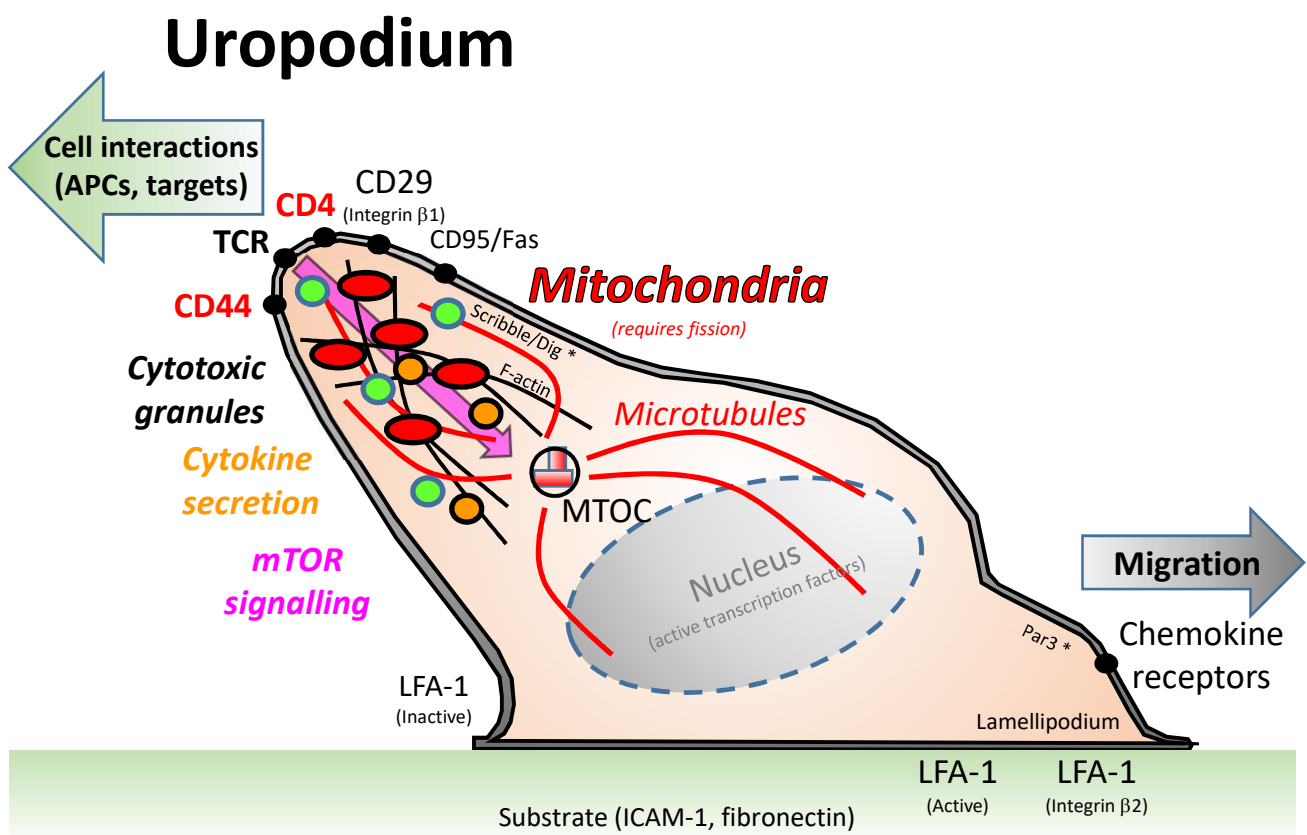

## Figure 8

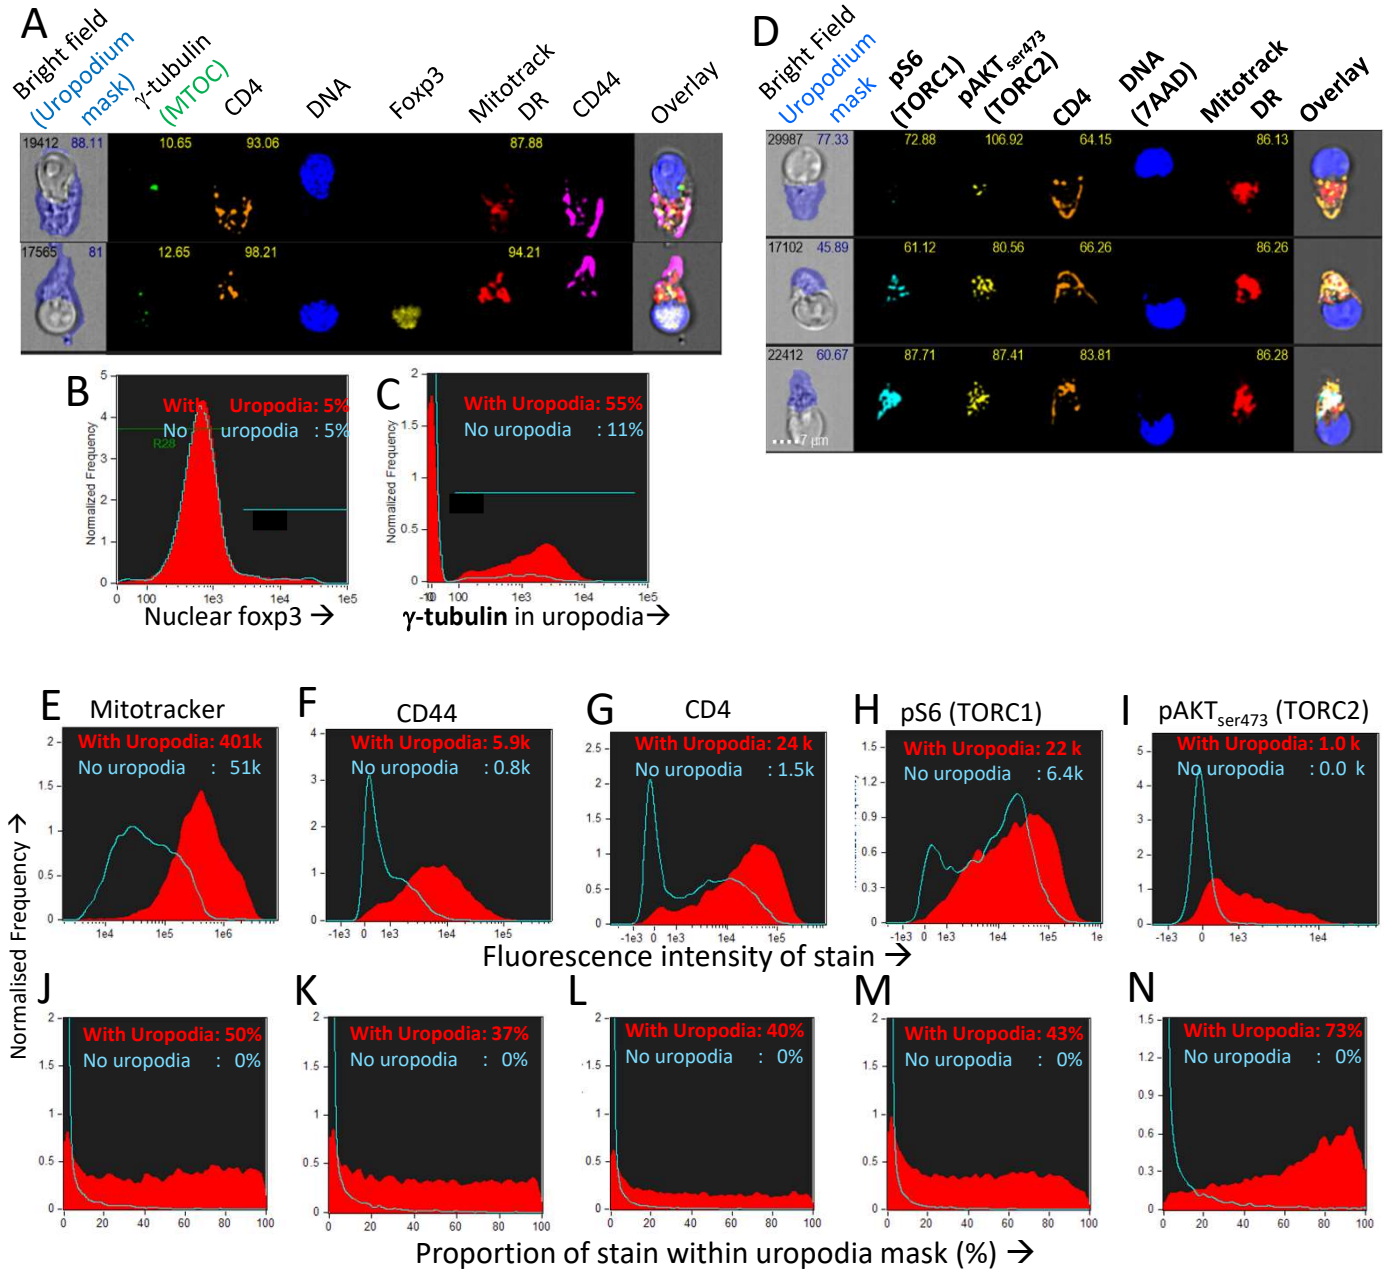



## Figure 9

Gated on live CD4<sup>+</sup> T cells BEFORE first division

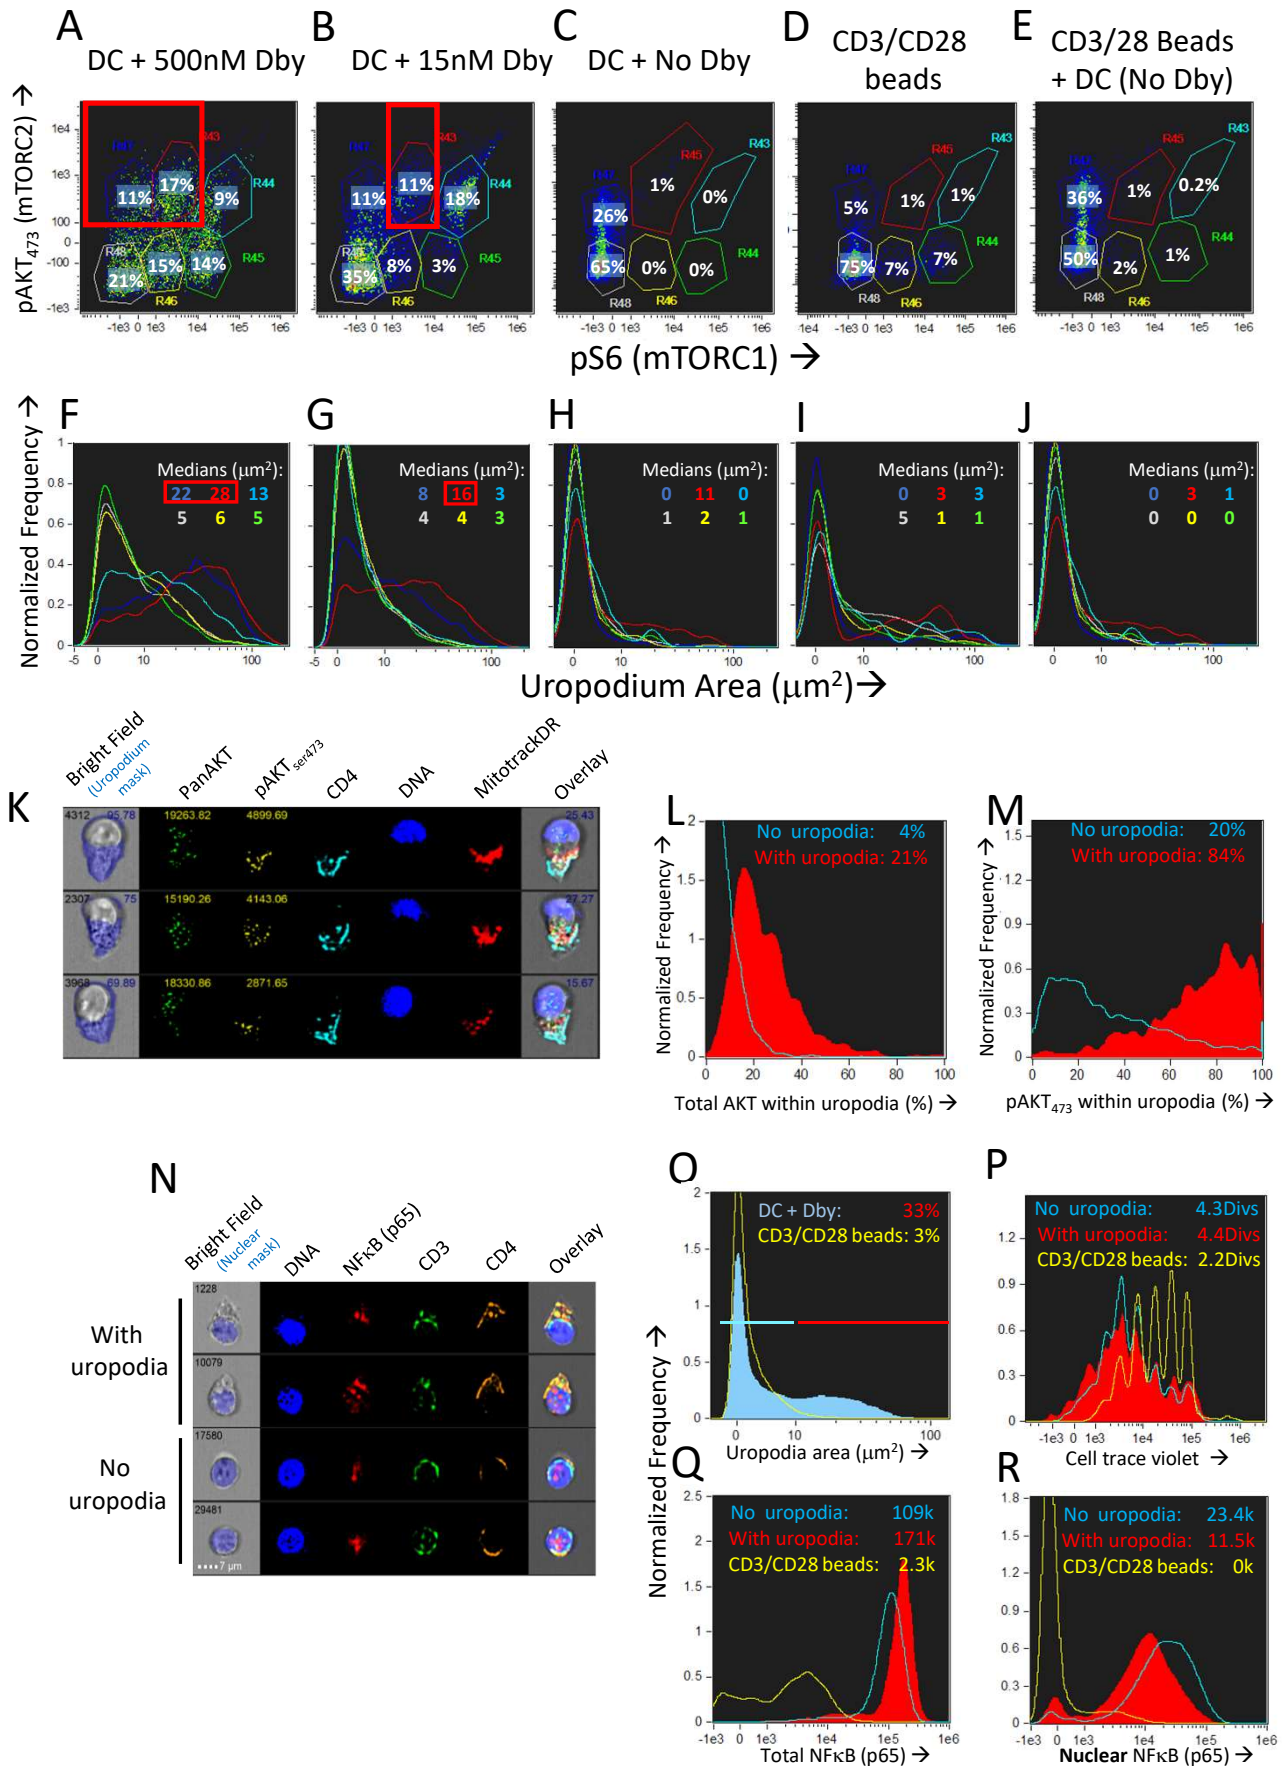

## Figure 10

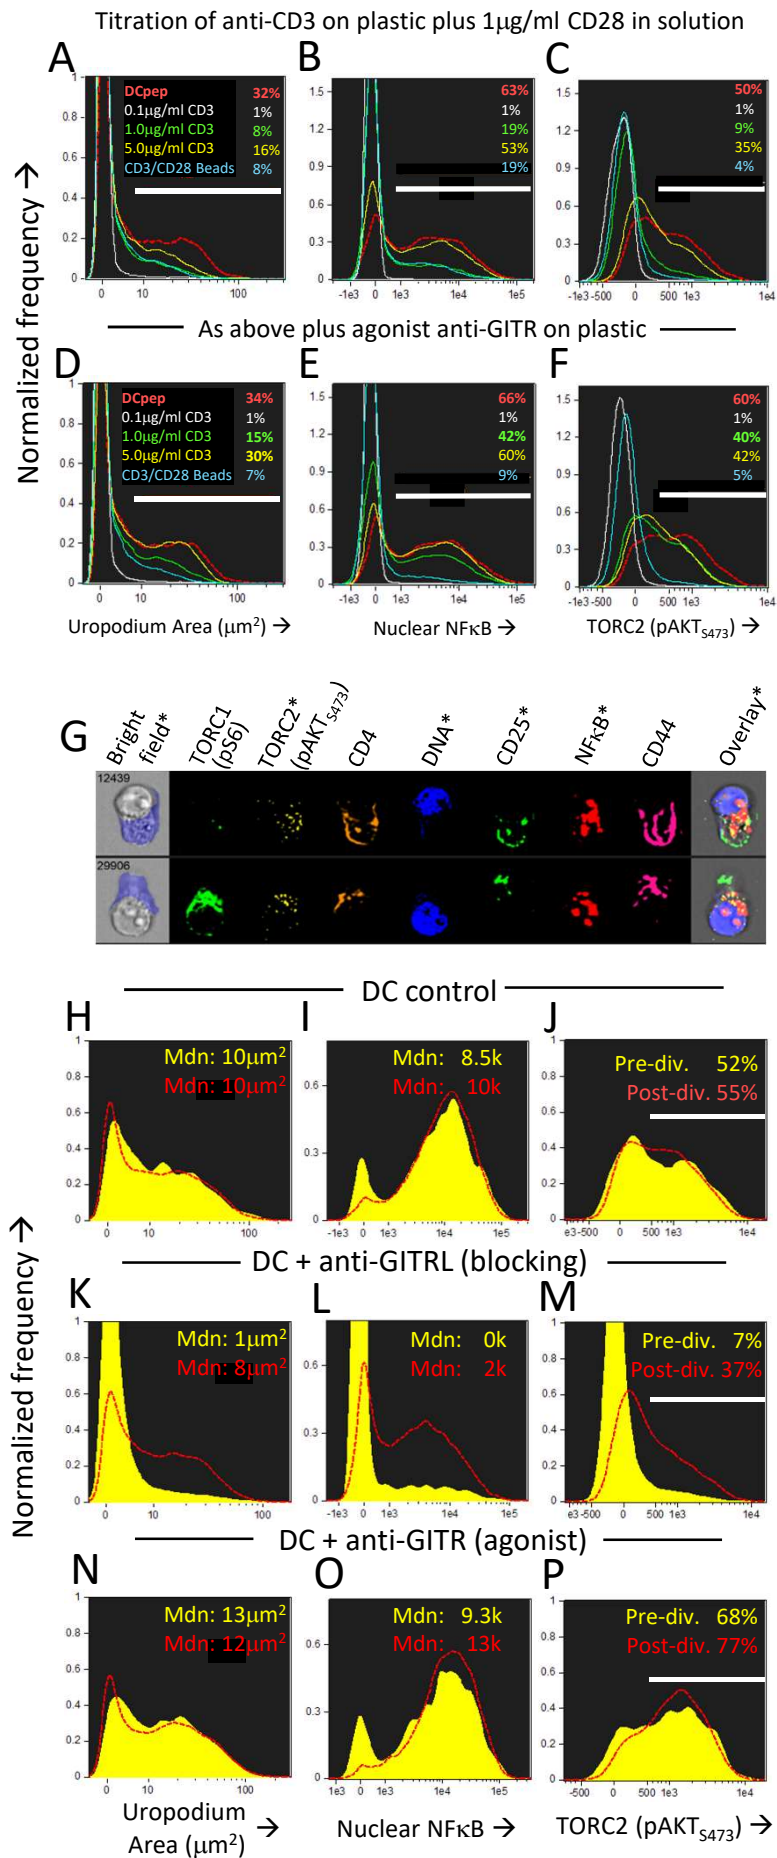

## Figure 11

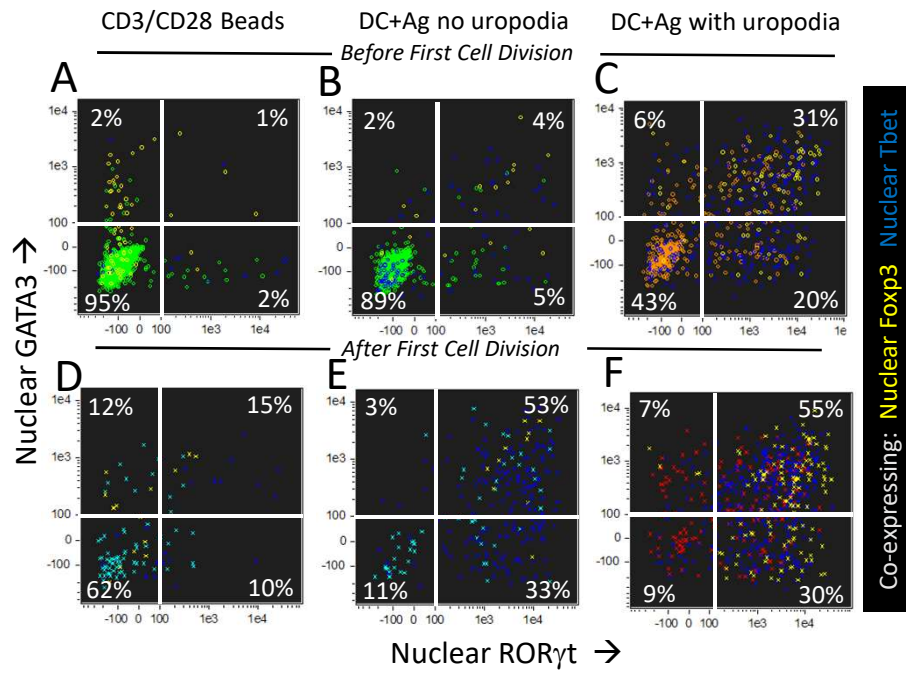

## Figure 12

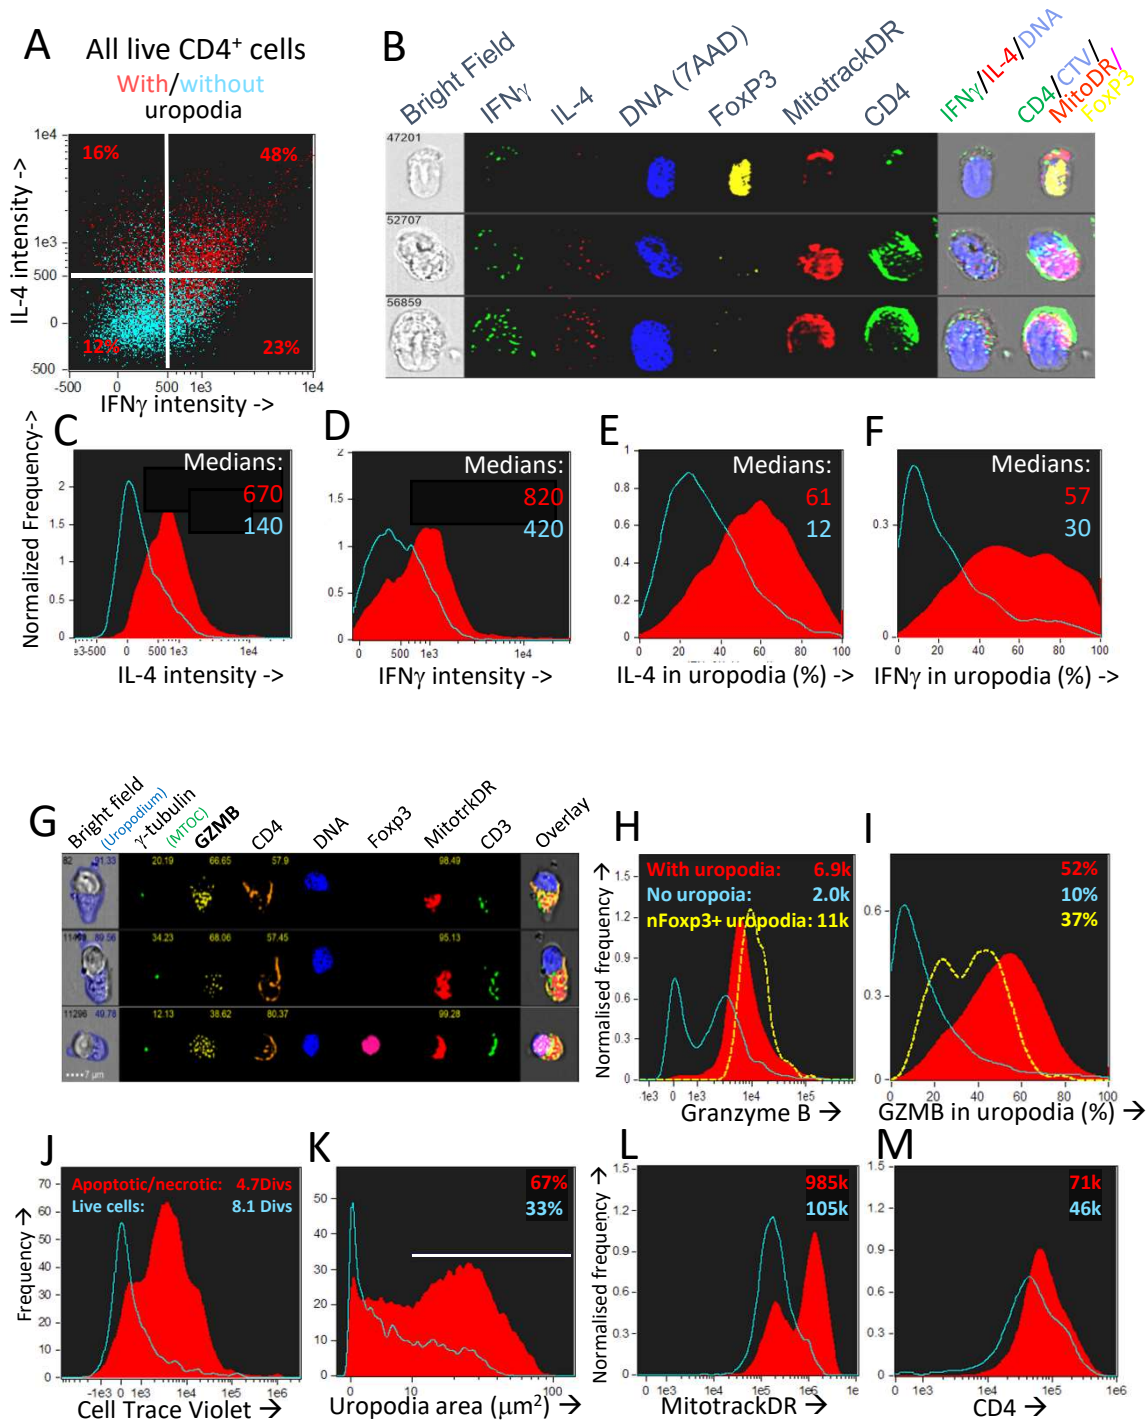



## Figure 13

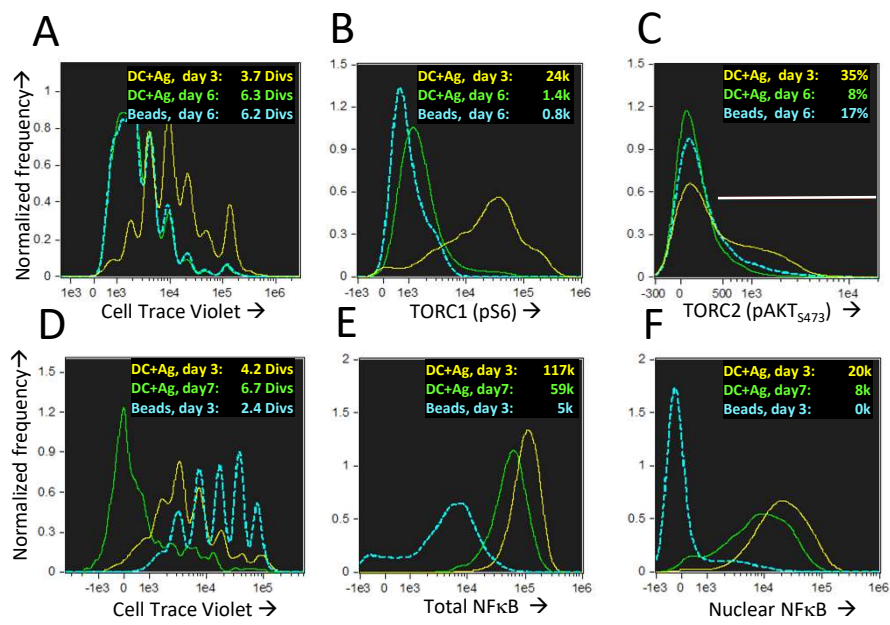

## Figure 14

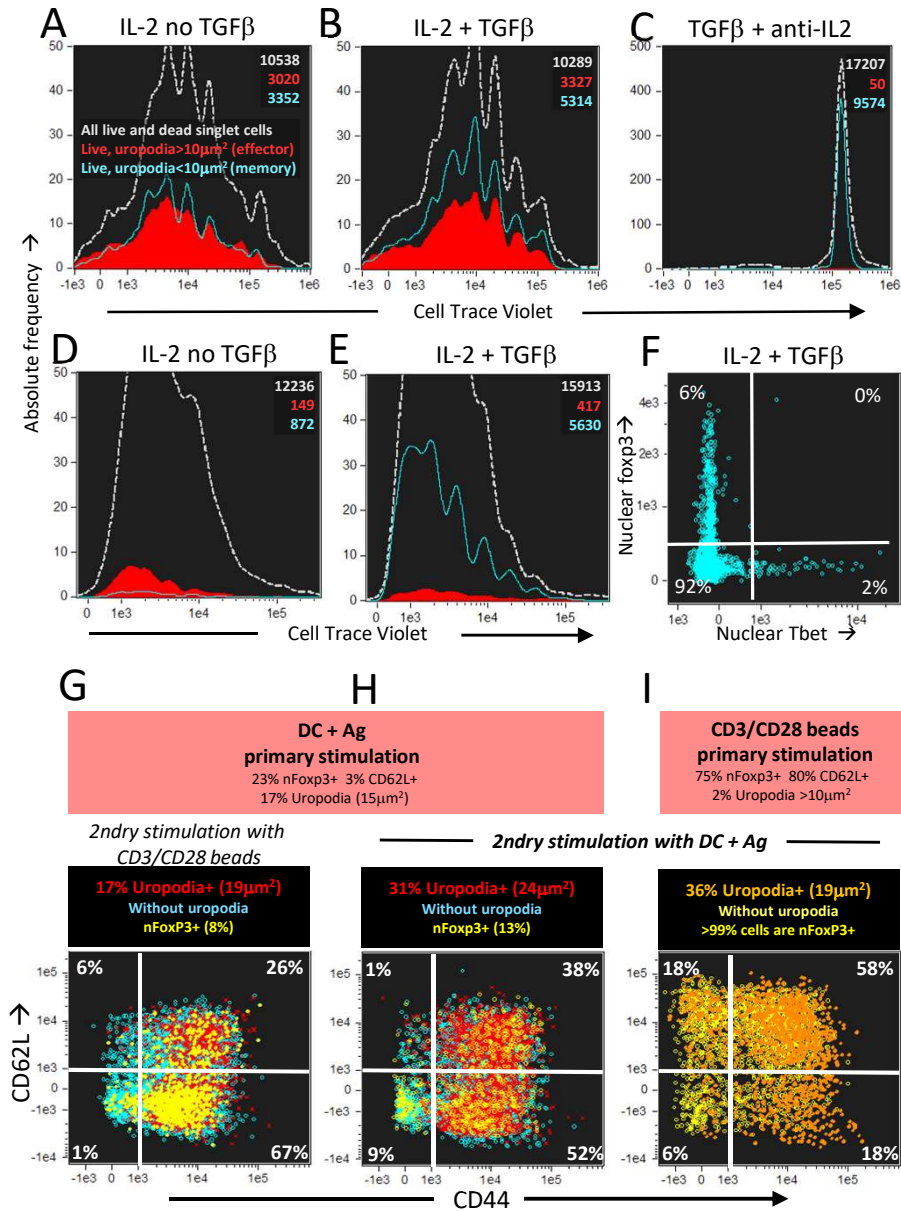

## Supplementary Video 1

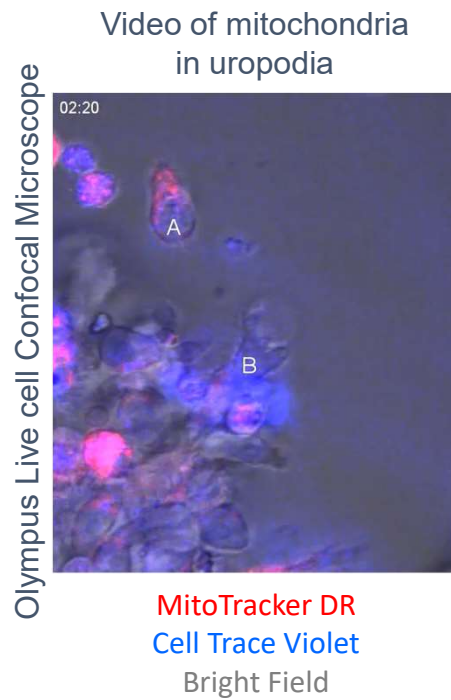

Source: http://biorxiv.org/content/10.1101/298026v1.full.pdf
